# Supplementary material for: Synthesis and reduction of [(C5H4SiMe3)2Ln(μ-OR)]2 (Ln = La, Ce) complexes: structural effects of bridging alkoxides
Source: Royal Society of Chemistry journal article supplement (doi:10.1039/d4dt02137a), 2024-01-01
Supplement: d4dt02137a1.pdf [file d4dt02137a1.pdf]

**Synthesis and Reduction of  $[(C_5H_4SiMe_3)_2Ln(\mu-OR)]_2$  (Ln = La, Ce) Complexes:  
Structural Effects of Bridging Alkoxides**

Adrian N. Brown,<sup>a</sup> Jack N. Kelleher,<sup>a</sup> Alexander M. Brown,<sup>b</sup> Peter Saghy,<sup>b</sup> Joshua J. Bohl,<sup>a</sup>  
Jerome R. Robinson<sup>b\*</sup> and Daniel N. Huh<sup>a\*</sup>

<sup>a</sup>Department of Chemistry, University of Rhode Island, Kingston, Rhode Island 02881

<sup>b</sup>Department of Chemistry, Brown University, Providence, Rhode Island 02912

**Electronic Supplementary Information**

|                                                                                                                                                                      |     |
|----------------------------------------------------------------------------------------------------------------------------------------------------------------------|-----|
| <b>Fig S1.</b> Crystal structures representing C...C distances less than 4.0 Å between -OR group and sp <sup>2</sup> carbon distances.                               | S2  |
| <b>Fig S2.</b> <sup>1</sup> H NMR spectrum of <b>2-La/Et</b> (C <sub>6</sub> D <sub>6</sub> , 400 MHz).                                                              | S3  |
| <b>Fig S3.</b> <sup>13</sup> C{ <sup>1</sup> H} NMR spectrum of <b>2-La/Et</b> (C <sub>6</sub> D <sub>6</sub> , 100.6 MHz).                                          | S3  |
| <b>Fig S4.</b> <sup>1</sup> H NMR spectrum of <b>2-La/iPr</b> (C <sub>6</sub> D <sub>6</sub> , 400 MHz).                                                             | S4  |
| <b>Fig S5.</b> <sup>13</sup> C{ <sup>1</sup> H} NMR spectrum of <b>2-La/iPr</b> (C <sub>6</sub> D <sub>6</sub> , 100.6 MHz).                                         | S4  |
| <b>Fig S6.</b> <sup>1</sup> H NMR spectrum of <b>2-La/C<sub>6</sub>H<sub>4</sub>-4-<sup>t</sup>Bu</b> (C <sub>6</sub> D <sub>6</sub> , 400 MHz)                      | S5  |
| <b>Fig S7.</b> <sup>13</sup> C{ <sup>1</sup> H} NMR spectrum of <b>2-La/C<sub>6</sub>H<sub>4</sub>-4-<sup>t</sup>Bu</b> (C <sub>6</sub> D <sub>6</sub> , 100.6 MHz). | S5  |
| <b>Fig S8.</b> <sup>1</sup> H NMR spectrum of <b>2-Ce/Et</b> (C <sub>6</sub> D <sub>6</sub> , 300 MHz).                                                              | S6  |
| <b>Fig S9.</b> <sup>1</sup> H NMR spectrum of <b>2-Ce/iPr</b> (C <sub>6</sub> D <sub>6</sub> , 300 MHz).                                                             | S6  |
| <b>Fig S10.</b> <sup>1</sup> H NMR spectrum of <b>2-Ce/C<sub>6</sub>H<sub>4</sub>-4-<sup>t</sup>Bu</b> (C <sub>6</sub> D <sub>6</sub> , 300 MHz).                    | S7  |
| <b>Fig S11.</b> <sup>1</sup> H NMR spectrum of <b>2-Ce/iPr</b> with 2 equiv. of THF (C <sub>6</sub> D <sub>6</sub> , 300 MHz).                                       | S7  |
| <b>Fig S12.</b> <sup>1</sup> H NMR spectrum Evans' Method of a toluene solution of <b>2-Ce/Et</b> .                                                                  | S8  |
| <b>Fig S13.</b> <sup>1</sup> H NMR spectrum Evans' Method of a toluene solution of <b>2-Ce/iPr</b> .                                                                 | S8  |
| <b>Fig S14.</b> <sup>1</sup> H NMR spectrum Evans' Method of a toluene solution of <b>2-Ce/C<sub>6</sub>H<sub>4</sub>-4-<sup>t</sup>Bu</b> .                         | S9  |
| <b>Fig S15.</b> 2D <sup>1</sup> H DOSY NMR spectra of 5.2 mM <b>2-Ce/iPr</b> in C <sub>6</sub> D <sub>6</sub> with 2 equiv. of THF.                                  | S9  |
| <b>Fig S16.</b> UV-vis spectra of <b>2-Ce/iPr</b> , <b>2-Ce/Et</b> , and <b>2-Ce/C<sub>6</sub>H<sub>4</sub>-4-<sup>t</sup>Bu</b> .                                   | S10 |
| <b>Fig S17.</b> UV-vis spectra of <i>in situ</i> reduction of <b>2-La/iPr</b> in THF using KC <sub>8</sub> + 2.2.2-crypt.                                            | S10 |
| <b>Fig S18.</b> CV traces (100 mV/s) of <b>2-La/iPr</b> (2.5 mM) in THF with [NBu <sub>4</sub> ][PF <sub>6</sub> ] (100 mM).                                         | S11 |
| <b>Fig S19.</b> CV traces and DPV scans of <b>2-La/iPr</b> (2.5 mM) in THF with [NBu <sub>4</sub> ][PF <sub>6</sub> ] (100 mM).                                      | S11 |
| <b>Fig S20.</b> CV traces (set 1) (100 mV/s) of <b>2-Ce/iPr</b> (2.5 mM) in THF with [NBu <sub>4</sub> ][PF <sub>6</sub> ] (100 mM).                                 | S12 |
| <b>Fig S21.</b> CV traces (set 2) (100 mV/s) of <b>2-Ce/iPr</b> (2.5 mM) in THF with [NBu <sub>4</sub> ][PF <sub>6</sub> ] (100 mM).                                 | S12 |
| <b>Fig S22.</b> CV traces (set 3) (100 mV/s) of <b>2-Ce/iPr</b> (2.5 mM) in THF with [NBu <sub>4</sub> ][PF <sub>6</sub> ] (100 mM).                                 | S13 |
| <b>Fig S23.</b> CV traces and DPV scans of <b>2-Ce/iPr</b> (2.5 mM) in THF with [NBu <sub>4</sub> ][PF <sub>6</sub> ] (100 mM).                                      | S13 |
| <b>Table S1.</b> Crystallographic parameters for compounds <b>2-Ce/Et</b> , <b>2-Ce/iPr</b> , and <b>2-La/iPr</b> .                                                  | S14 |
| <b>Table S2a.</b> Bond lengths (Å) for <b>2-Ce/Et</b> .                                                                                                              | S14 |
| <b>Table S2b.</b> Bond angles (°) for <b>2-Ce/Et</b> .                                                                                                               | S15 |
| <b>Table S3a.</b> Bond lengths (Å) for <b>2-La/iPr</b> .                                                                                                             | S16 |
| <b>Table S3b.</b> Bond angles (°) for <b>2-La/iPr</b> .                                                                                                              | S17 |
| <b>Table S4a.</b> Bond lengths (Å) for <b>2-Ce/iPr</b> .                                                                                                             | S21 |
| <b>Table S4b.</b> Bond angles (°) for <b>2-Ce/iPr</b> .                                                                                                              | S22 |
| <b>Fig S24.</b> Determination of $r_{H(\text{theo})}$ from the crystal structure of <b>2-Ce/iPr</b> .                                                                | S26 |
| <b>References</b>                                                                                                                                                    | S26 |

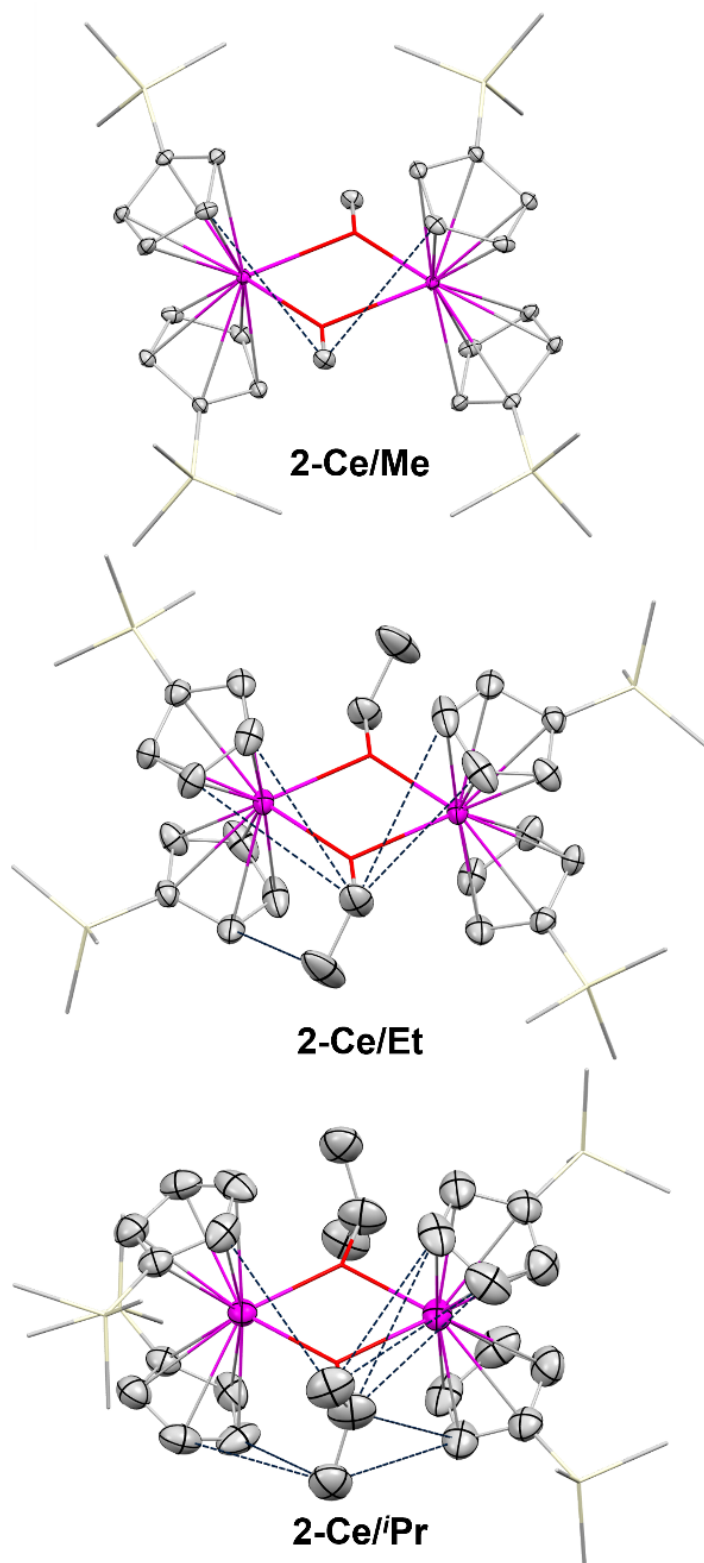

**Fig S1.** Crystal structures of **2-Ce/Me**,<sup>1</sup> **2-Ce/Et**, and **2-Ce/*i*Pr** with blue dashed lines representing C...C distances less than 4.0 Å between -OR group and sp<sup>2</sup> carbon distances.

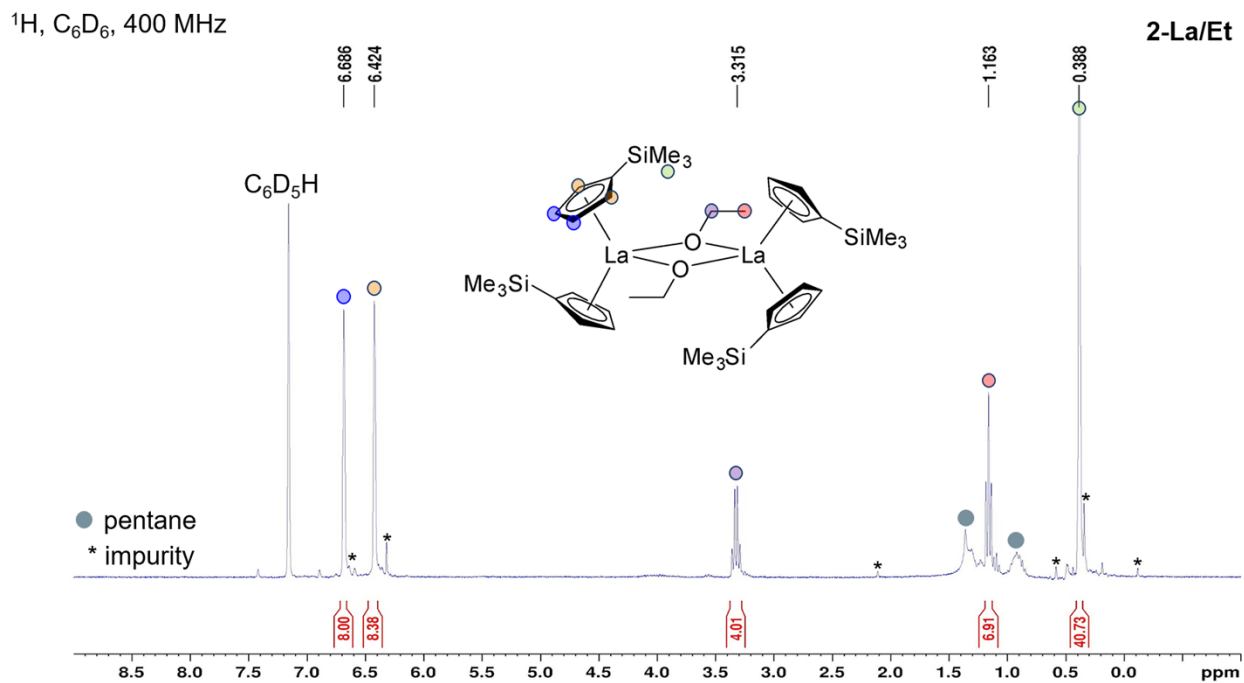

**Fig S2.**  $^1\text{H}$  NMR spectrum of **2-La/Et** ( $\text{C}_6\text{D}_6$ , 400 MHz).

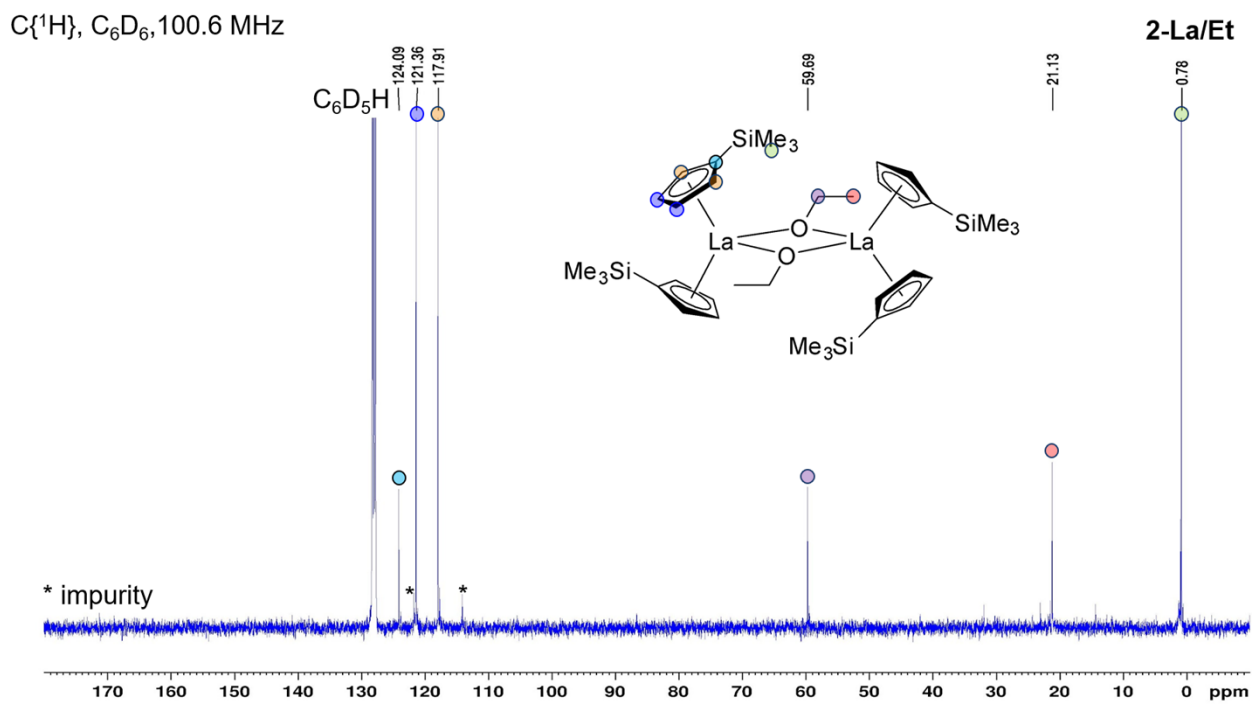

**Fig S3.**  $^{13}\text{C}\{^1\text{H}\}$  NMR spectrum of **2-La/Et** ( $\text{C}_6\text{D}_6$ , 100.6 MHz).

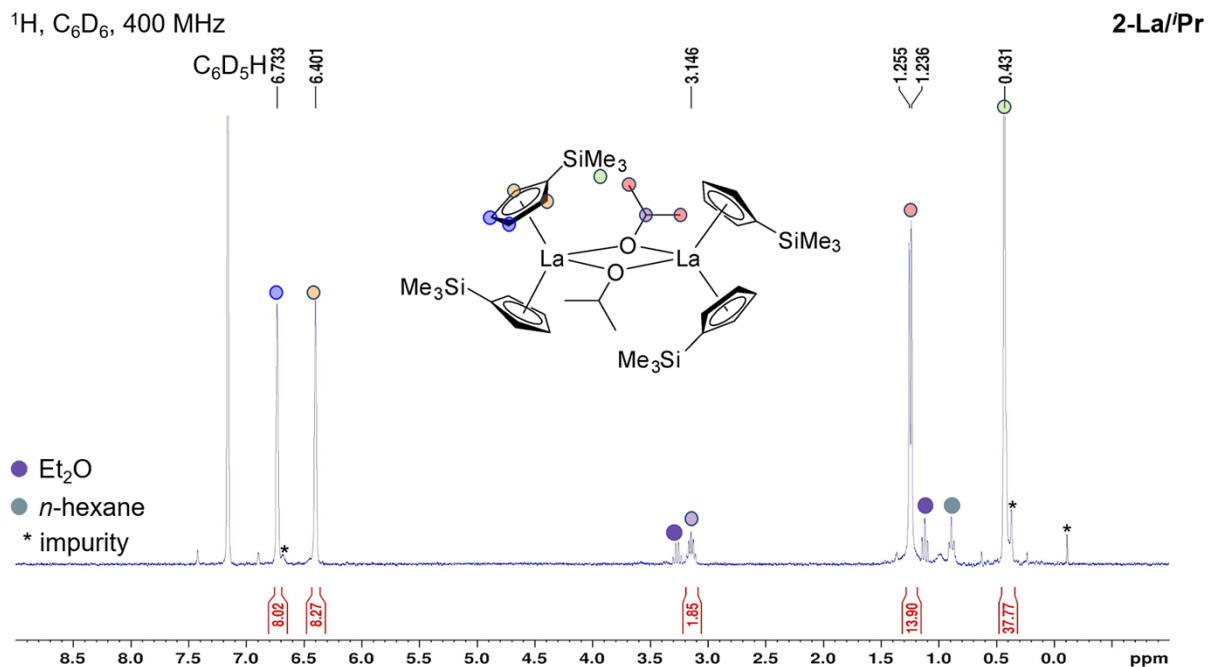

**Fig S4.**  $^1\text{H}$  NMR spectrum of **2-La/Pr** ( $\text{C}_6\text{D}_6$ , 400 MHz).

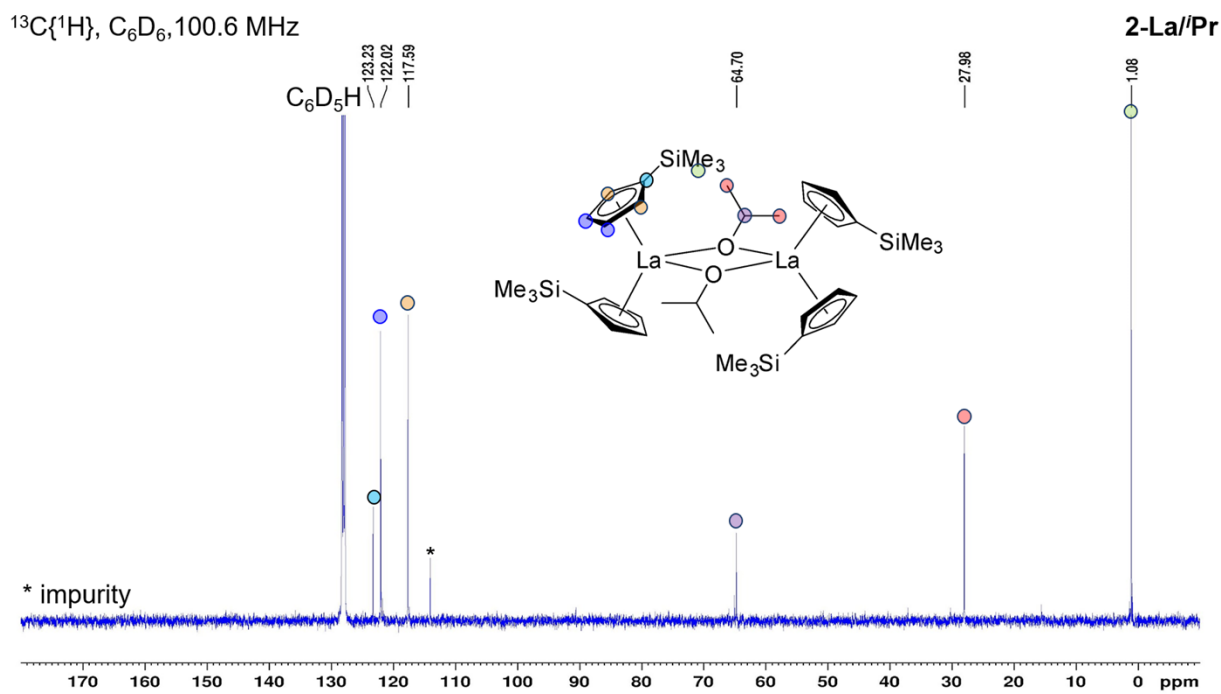

**Fig S5.**  $^{13}\text{C}\{^1\text{H}\}$  NMR spectrum of **2-La/Pr** ( $\text{C}_6\text{D}_6$ , 100.6 MHz).



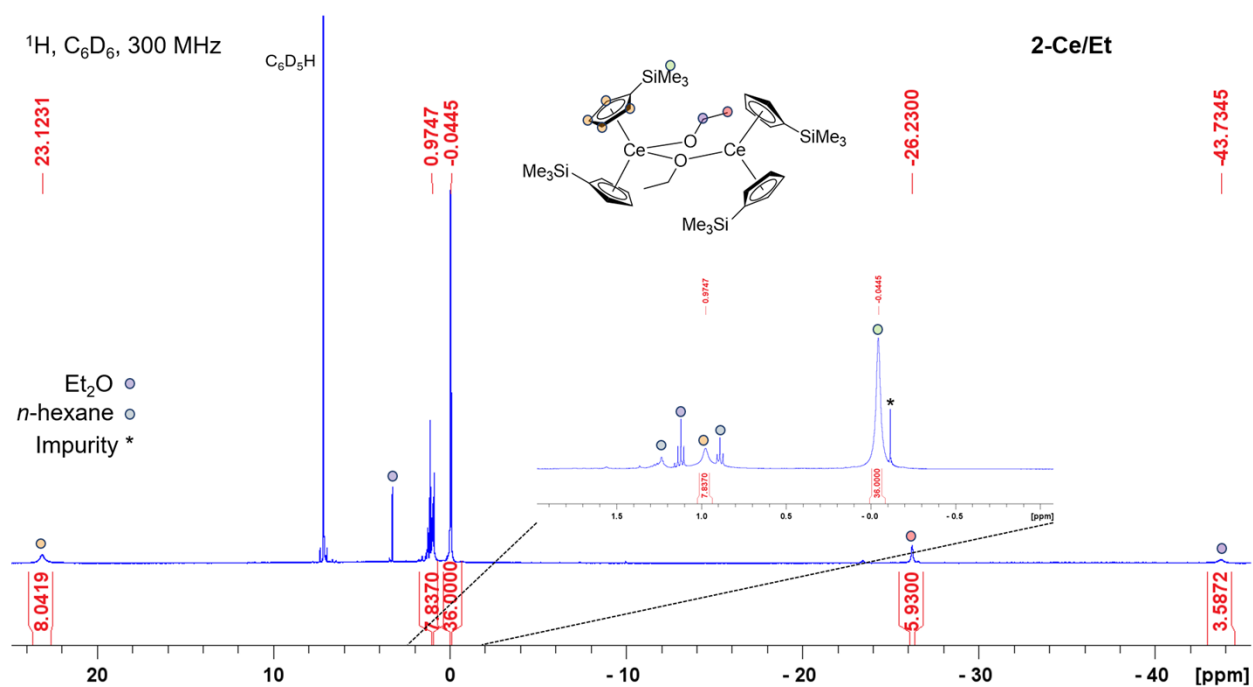

**Fig S8.**  $^1\text{H}$  NMR spectrum of **2-Ce/Et** ( $\text{C}_6\text{D}_6$ , 300 MHz).

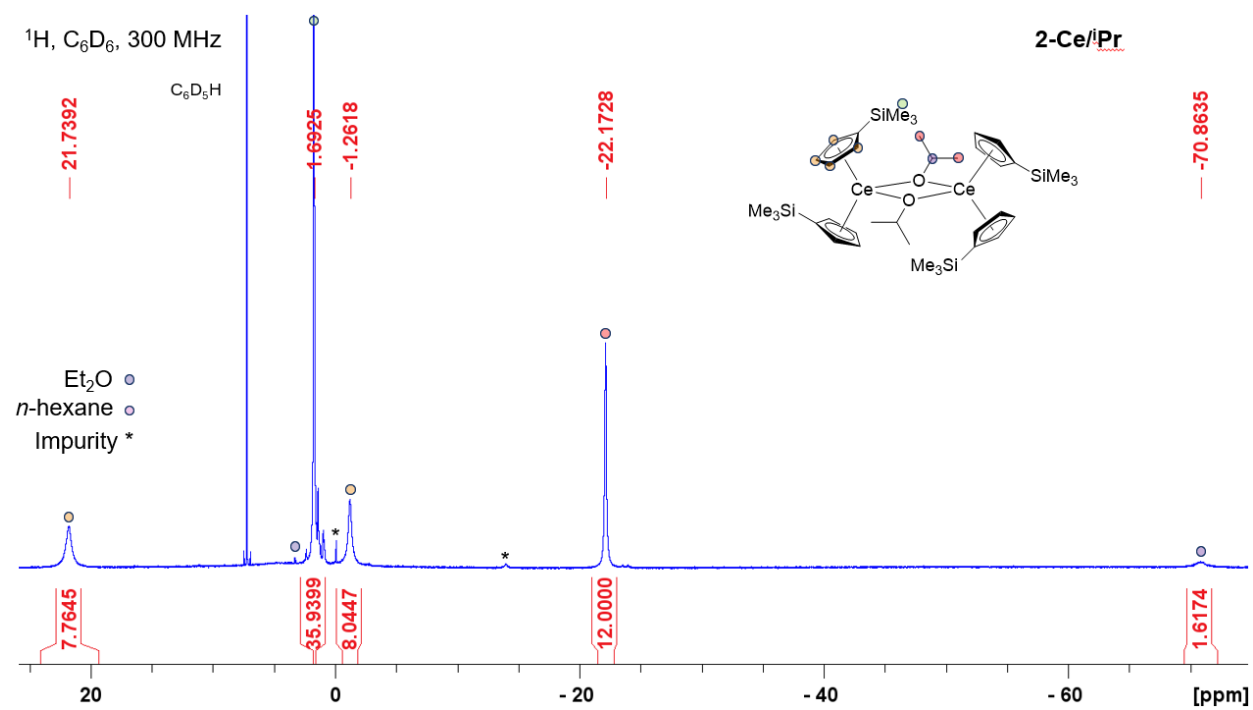

**Fig S9.**  $^1\text{H}$  NMR spectrum of **2-Ce/Pr** ( $\text{C}_6\text{D}_6$ , 300 MHz).

$^1\text{H}$ ,  $\text{C}_6\text{D}_6$ , 300 MHz

**2-Ce/C<sub>6</sub>H<sub>4</sub>-4-<sup>t</sup>Bu**

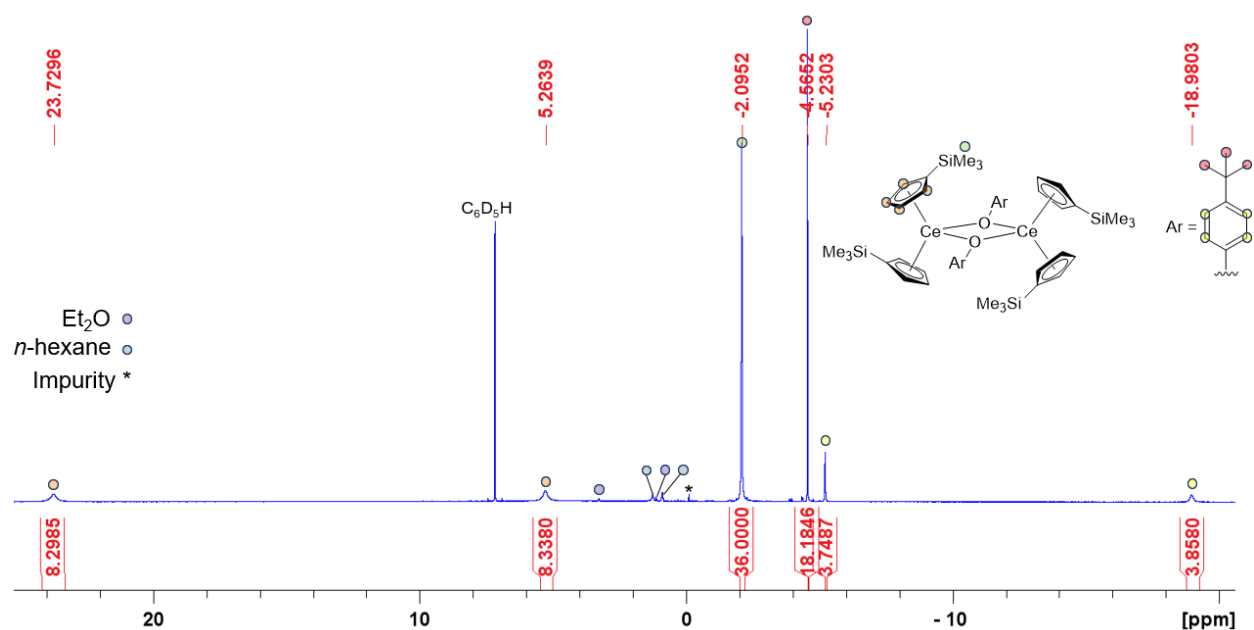

**Fig S10.**  $^1\text{H}$  NMR spectrum of **2-Ce/C<sub>6</sub>H<sub>4</sub>-4-<sup>t</sup>Bu** ( $\text{C}_6\text{D}_6$ , 300 MHz).

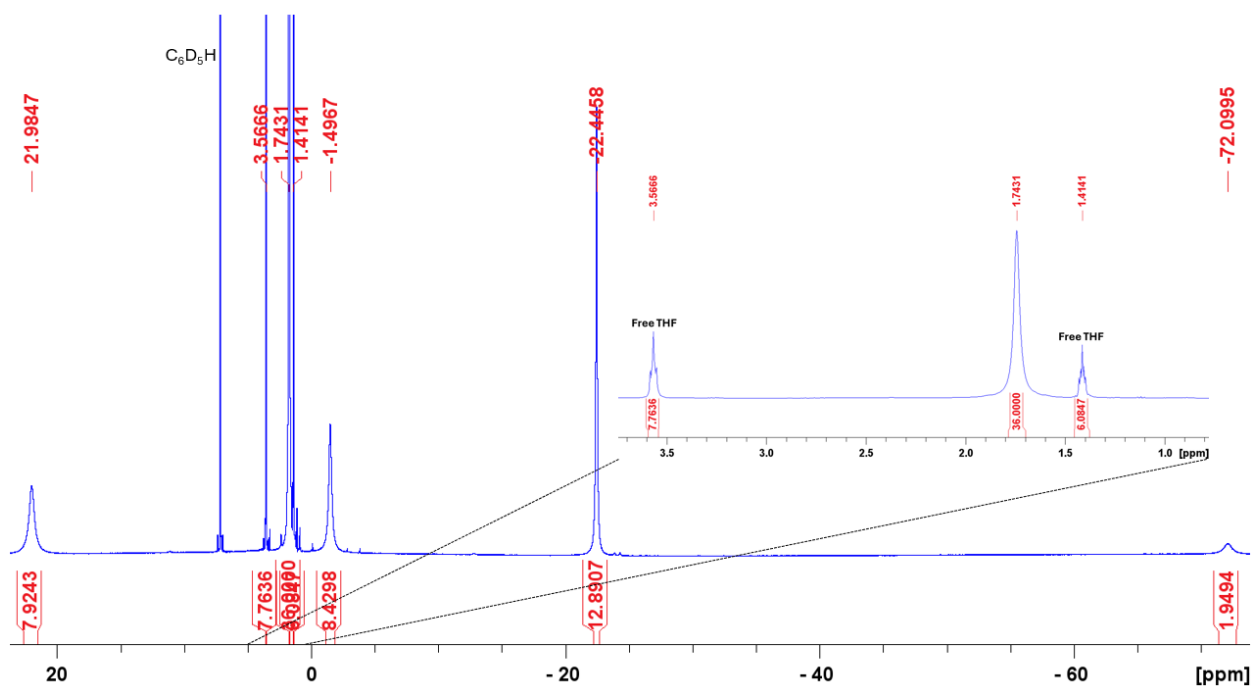

**Fig S11.**  $^1\text{H}$  NMR spectrum of **2-Ce/Pr** with 2 equiv. of THF ( $\text{C}_6\text{D}_6$ , 300 MHz).

$^1\text{H}$ , Toluene, 300 MHz  
2.65 mM

**2-Ce/Et**

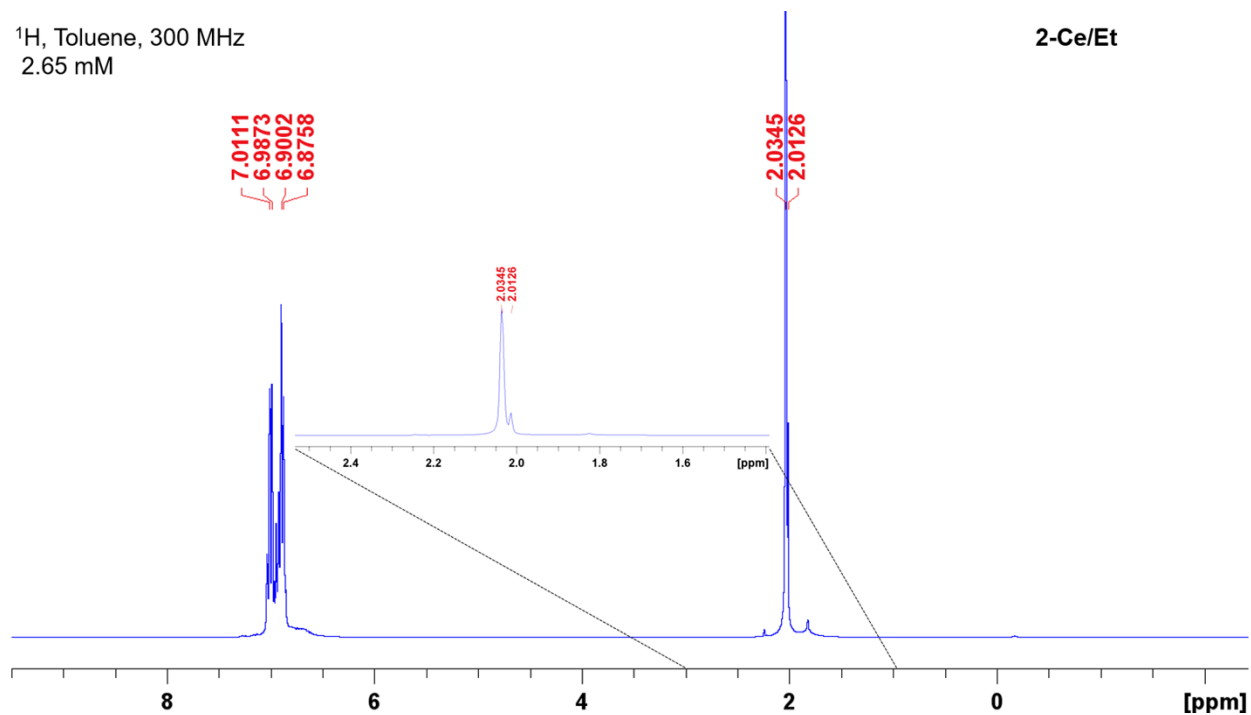

**Fig S12.**  $^1\text{H}$  NMR spectrum Evans' Method of a 2.65 mM toluene solution of **2-Ce/Et** with toluene capillary:  $1.28 \mu_{\text{B}}$ . Low magnetic moment may be ascribed to antiferromagnetic coupling or superexchange due to the short Ce•••Ce distance: 3.8052(6) Å.

$^1\text{H}$ , Toluene, 300 MHz  
20.37 mM

**2-Ce/iPr**

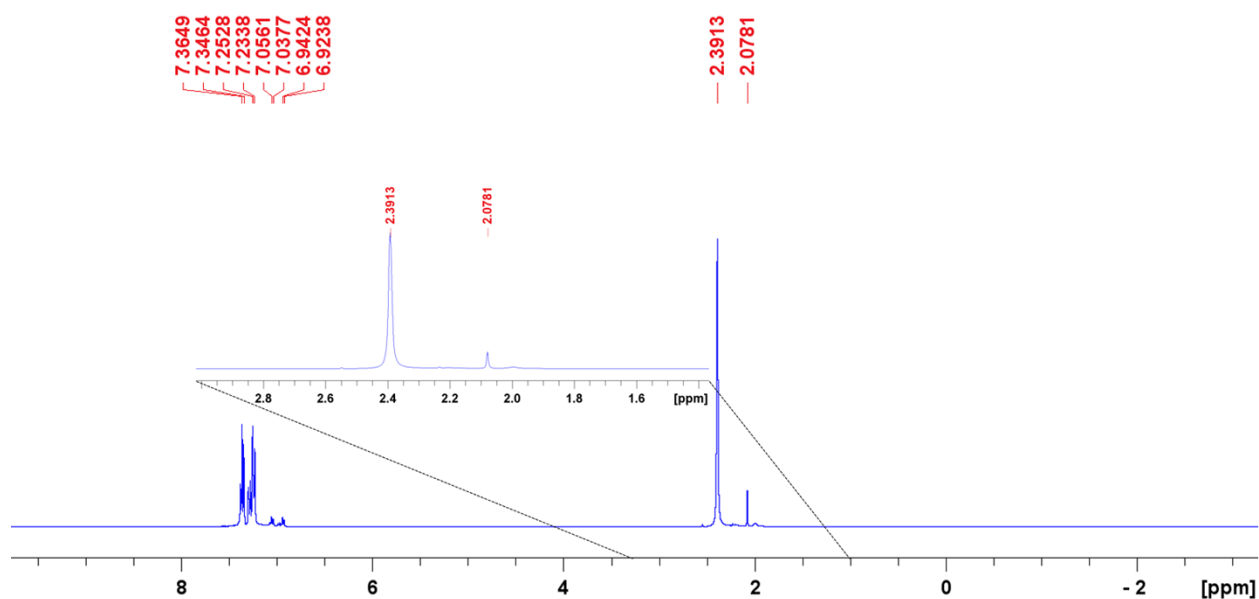

**Fig S13.**  $^1\text{H}$  NMR spectrum Evans' Method of a 20.37 mM toluene solution of **2-Ce/iPr** with toluene capillary:  $1.90 \mu_{\text{B}}$ . Low magnetic moment may be ascribed to antiferromagnetic coupling or superexchange due to the short Ce•••Ce distance: 3.7977(8), 3.7810(8) Å.



$^1\text{H}$ , Toluene, 300 MHz  
2.16 mM

2-Ce/C<sub>6</sub>H<sub>4</sub>-4-<sup>t</sup>Bu

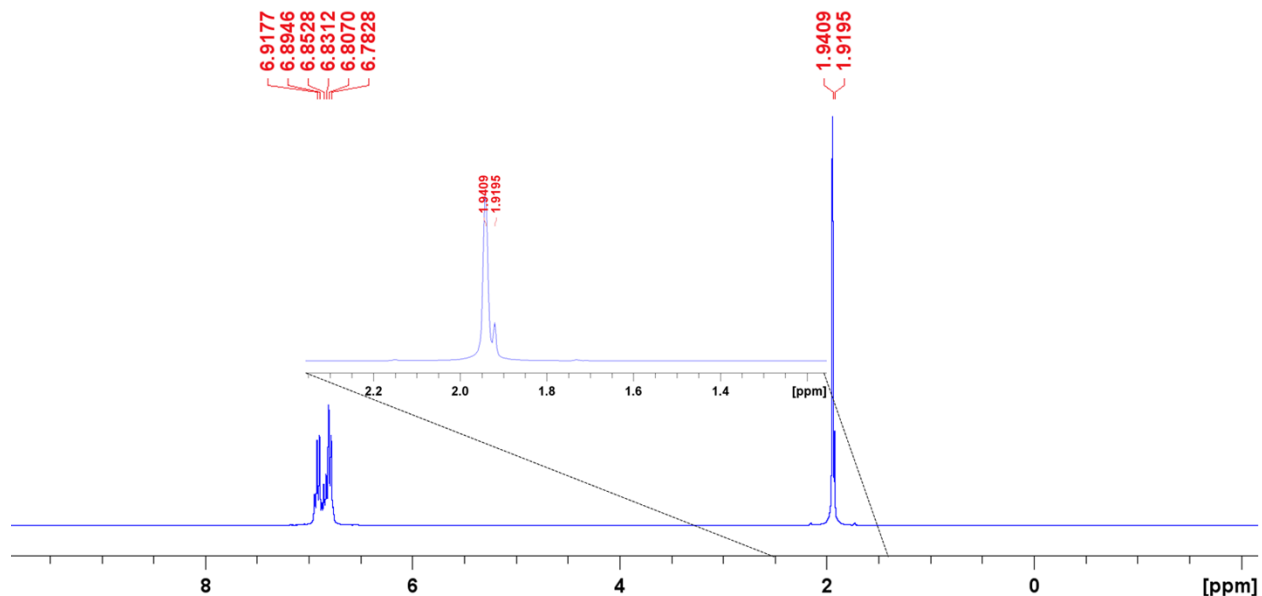

**Fig S14.**  $^1\text{H}$  NMR spectrum Evans' Method of a 2.16 mM toluene solution of **2-Ce/C<sub>6</sub>H<sub>4</sub>-4-<sup>t</sup>Bu** with toluene capillary:  $1.34 \mu\text{B}$ . Low magnetic moment may be ascribed to antiferromagnetic coupling or superexchange due to short Ce•••Ce distances.

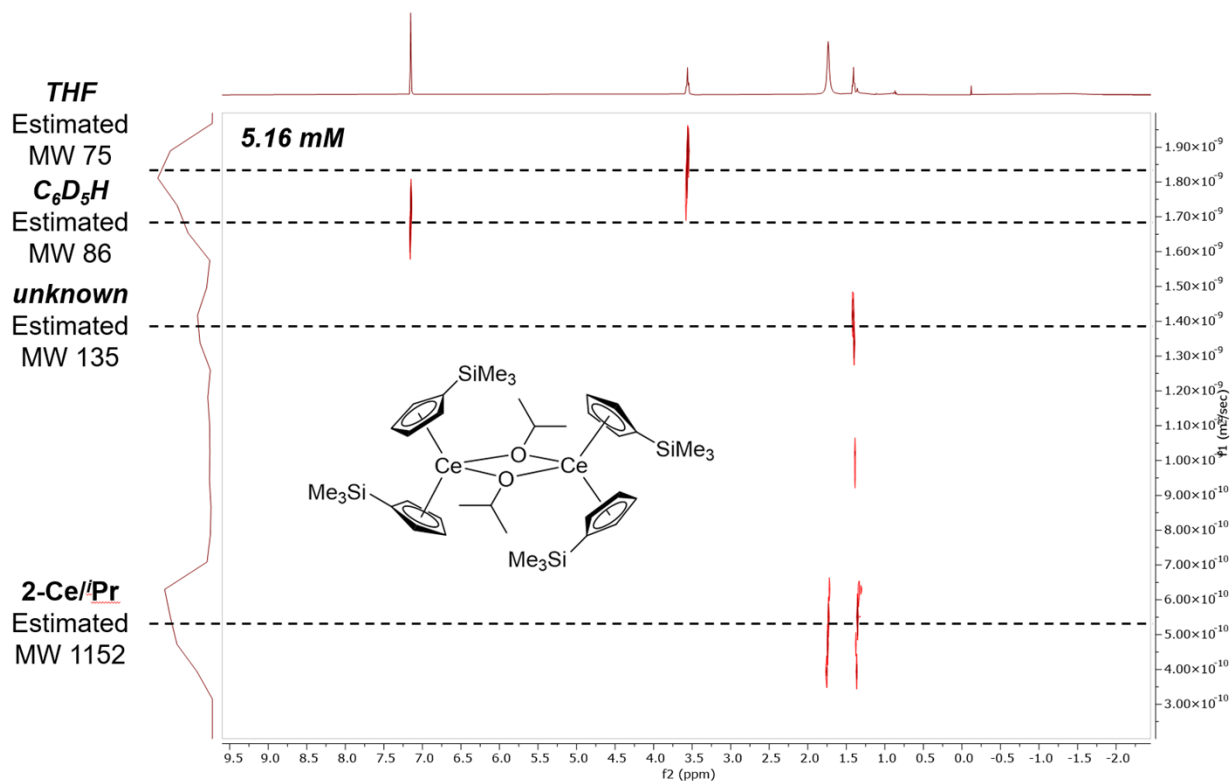

**Fig S15.** 2D  $^1\text{H}$  DOSY NMR spectra of 5.16 mM **2-Ce/iPr** in C<sub>6</sub>D<sub>6</sub> with 2 equiv. of THF.

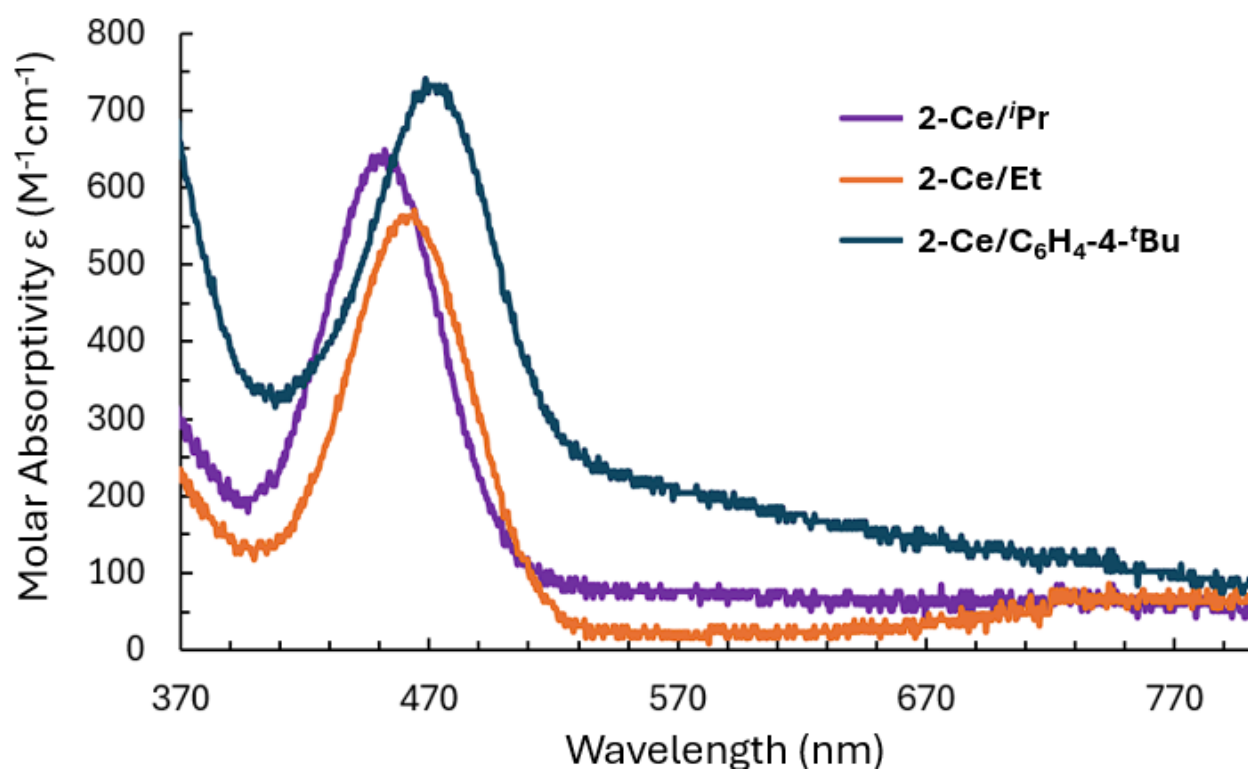

**Fig S16.** UV-vis spectra of **2-Ce/*i*Pr** (purple trace; toluene; 230  $\mu\text{M}$ ;  $\lambda_{\text{max}} = 452 \text{ nm}$ ), **2-Ce/Et** (orange trace; toluene; 260  $\mu\text{M}$ ;  $\lambda_{\text{max}} = 458 \text{ nm}$ ) and **2-Ce/ $\text{C}_6\text{H}_4$ -4-*t*Bu** (navy blue trace; toluene; 220  $\mu\text{M}$ ;  $\lambda_{\text{max}} = 471 \text{ nm}$ ).

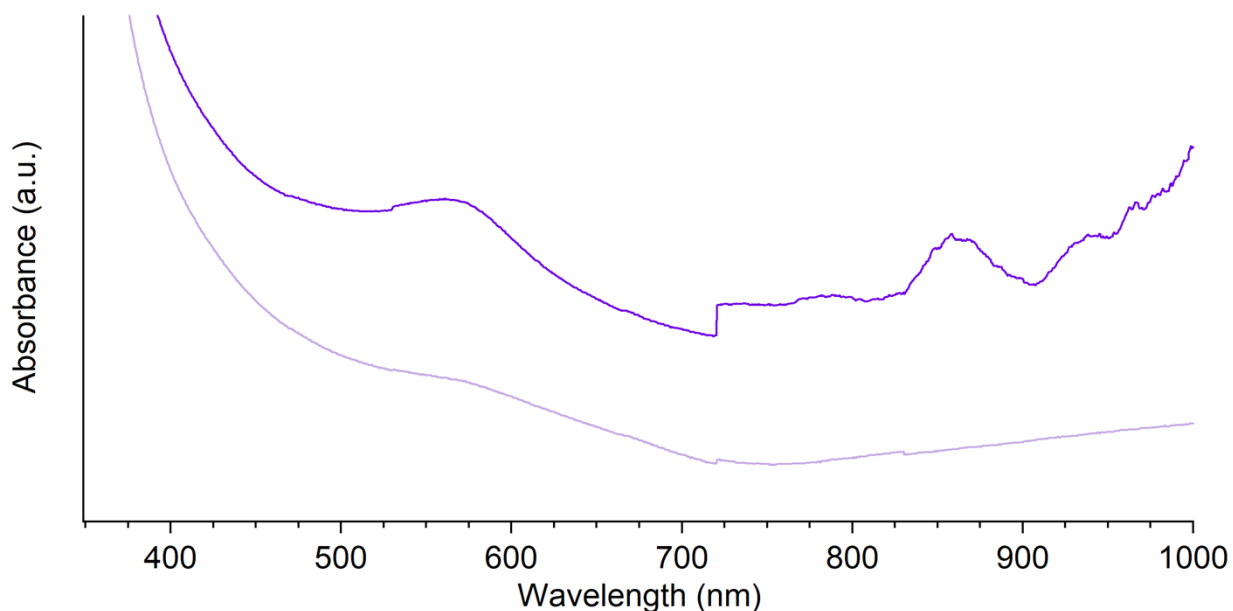

**Fig S17.** UV-vis spectrum of *in situ* reduction of **2-La/*i*Pr** (50 mg, 0.053 mmol) using  $\text{KC}_8$  (8 mg, 0.059 mmol) and 2.2.2-cryptand (22 mg, 0.059 mmol) in 2 mL of THF at  $-78 \text{ }^\circ\text{C}$ . Sample was transferred to an air-free cuvette while  $-78 \text{ }^\circ\text{C}$ . Prior to measurement, the sample was warmed to RT then immediately placed in the spectrometer for measurement (dark purple trace). After 5 mins, another spectrum was collected on the same sample (light purple trace).

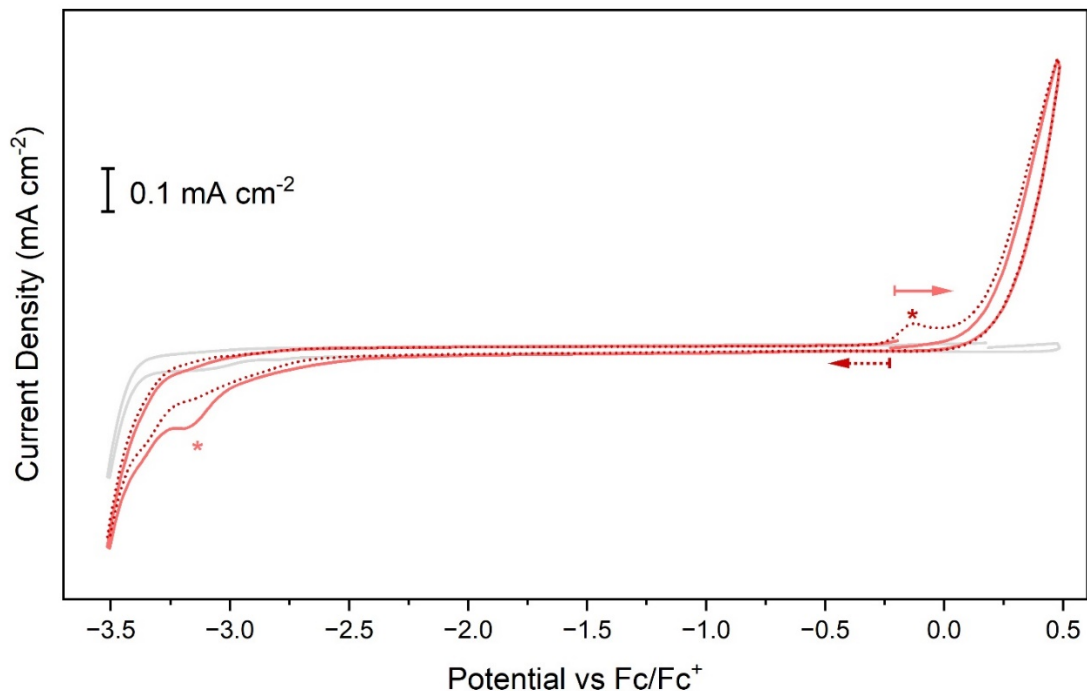

**Fig. S18.** CV traces (100 mV/s) of **2-La/Pr** (2.5 mM) in THF with  $[\text{NBu}_4][\text{PF}_6]$  (100 mM) as the supporting electrolyte, with arrows indicating the scanning direction. Background: gray, Cathodic: red (dashed), Anodic: pink (solid).

**Note:** The pronounced increase in current above 0 V vs  $\text{Fc}/\text{Fc}^+$  was attributed to ligand oxidation, while the current response below -3.2 V vs  $\text{Fc}/\text{Fc}^+$  was attributed to a  $\text{La}^{\text{III/II}}$  reduction event. \* correspond to redox peaks arising from decomposition products.

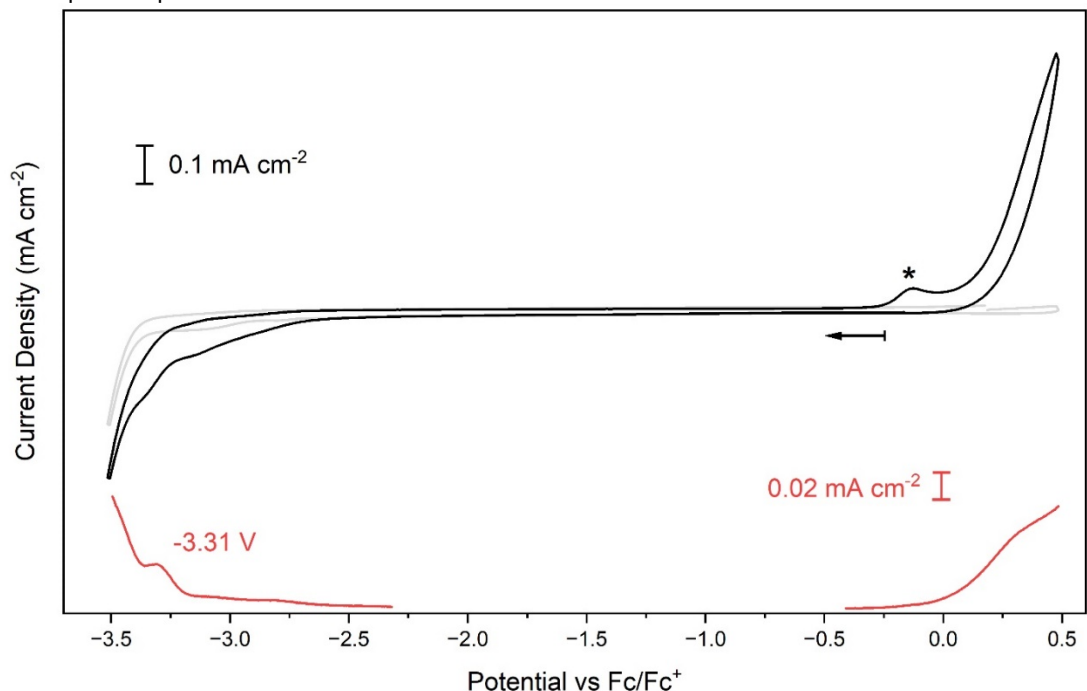

**Fig. S19.** (Top) CV trace (100 mV/s) of **2-La/Pr** (2.5 mM) in THF with  $[\text{NBu}_4][\text{PF}_6]$  (100 mM) as the supporting electrolyte, with arrows indicating the scanning direction. Background: gray, Anodic: black (solid), Anodic: pink (solid). \* corresponds to redox peaks arising from decomposition products. (Bottom) DPV scans (red lines) at 10 mV/s, displayed with absolute values of the current density.

**Note:** DPV scans indicate a reduction event at -3.31 V vs  $\text{Fc}/\text{Fc}^+$ , in line with the a  $\text{La}^{\text{III/II}}$  reduction event.

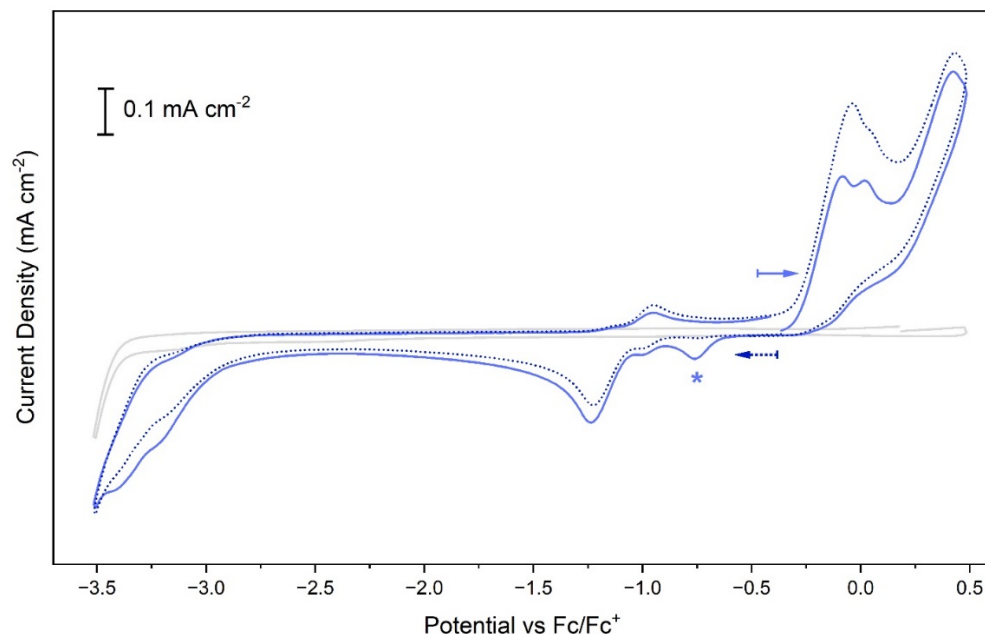

**Fig. S20.** CV traces (100 mV/s) of **2-Ce/Pr** (2.5 mM) in THF with  $[\text{NBu}_4][\text{PF}_6]$  (100 mM) as the supporting electrolyte, with arrows indicating the scanning direction. Background: gray, Cathodic: blue (dashed), Anodic: light-blue (solid). \* correspond to redox peaks arising from decomposition products.

**Note:**  $\text{Ce}^{\text{III}}/\text{Ce}^{\text{IV}}$  oxidation events were found to overlap with ligand oxidation at and above  $-0.2$  V vs  $\text{Fc}/\text{Fc}^+$ , while the current response below  $-3.2$  V vs  $\text{Fc}/\text{Fc}^+$  is associated with a  $\text{Ce}^{\text{III/II}}$  reduction event. The unexpected reduction event at  $-1.25$  V vs  $\text{Fc}/\text{Fc}^+$  arose due to the presence of a  $\text{Ce}^{\text{IV}}$  species generated by the reaction of **2-Ce/Pr** with small amounts of  $\text{Ag}^+$  leached from the reference electrode.

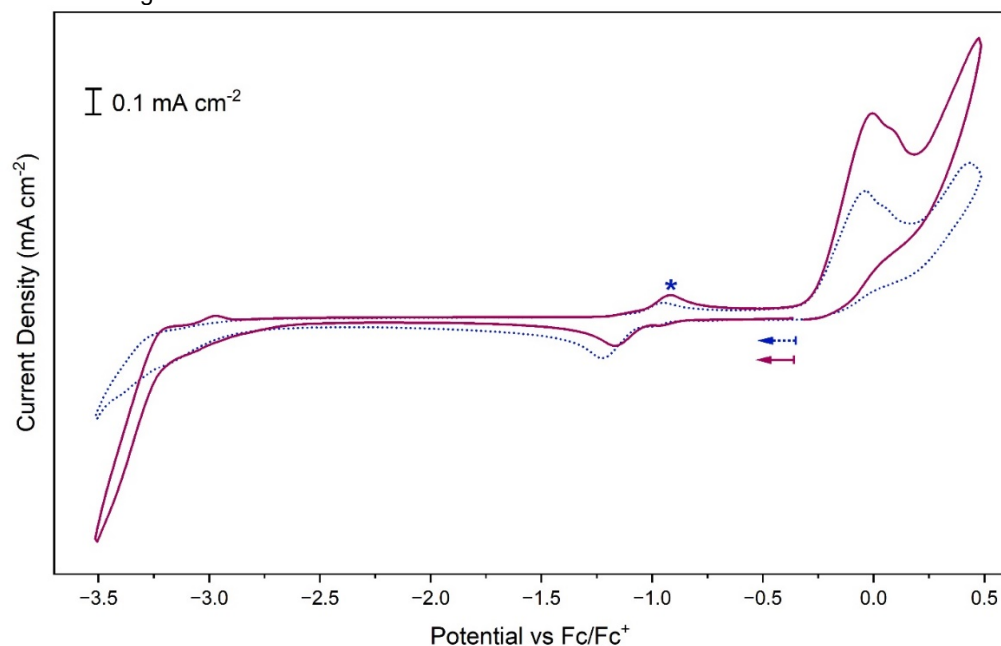

**Fig. S21.** CV traces (100 mV/s) of **2-Ce/Pr** at 2.5 mM (blue, dashed) and 5 mM (burgundy, solid) in THF with  $[\text{NBu}_4][\text{PF}_6]$  (100 mM) as the supporting electrolyte, with arrows indicating the scanning direction. \* correspond to redox peaks arising from decomposition products.

**Note:** Assignment of the reduction peak at  $-1.2$  V as a decomposition product generated by adventitious  $\text{Ag}^+$  leached from the reference electrode was made by assessing the current response from two different analyte concentrations. The current response at  $E > -0.25$  V vs  $\text{Fc}/\text{Fc}^+$  ( $\text{Ce}^{\text{III}}$  and ligand oxidation) and at  $E < -3.2$  V vs  $\text{Fc}/\text{Fc}^+$  ( $\text{Ce}^{\text{III}}$  reduction) increased with increasing analyte concentration, while the current response of the reduction peak at  $-1.2$  V did not change significantly.

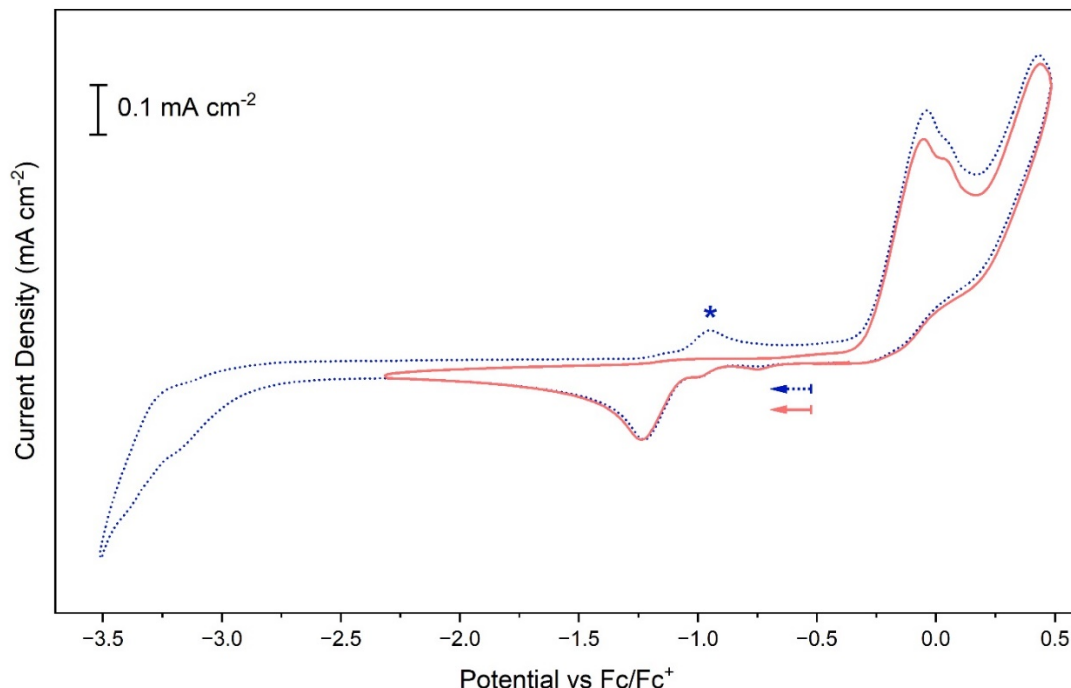

**Fig. S22.** CV traces (100 mV/s) of **2-Ce/Pr** (2.5 mM) in THF with  $[\text{NBu}_4][\text{PF}_6]$  (100 mM) as the supporting electrolyte, with arrows indicating the scanning direction. Cathodic, full-scan: blue (dashed), Cathodic, partial-scan: light-blue (dashed). \* corresponds to redox peaks arising from decomposition products.

**Note:** The oxidation peak at  $-1.0$  V vs  $\text{Fc}/\text{Fc}^+$  was found to belong to a decomposition product generated upon  $\text{Ce}^{\text{III/II}}$  reduction at  $< -3$  V vs  $\text{Fc}/\text{Fc}^+$ .

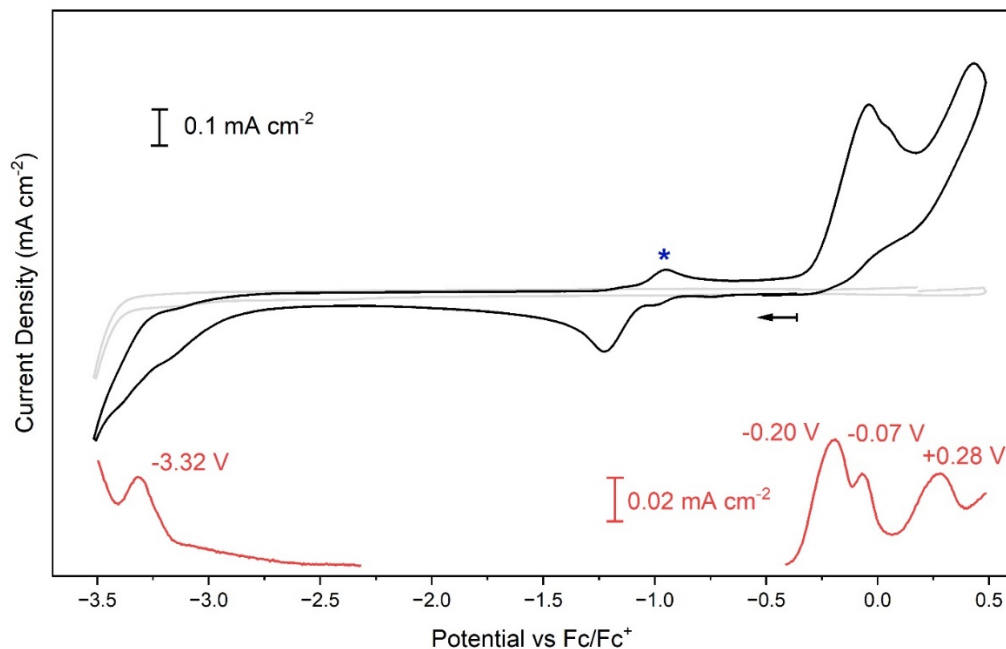

**Fig. S23.** CV trace (100 mV/s, background: gray) of **2-Ce/Pr** (2.5 mM, black solid-line) in THF with  $[\text{NBu}_4][\text{PF}_6]$  (100 mM) as the supporting electrolyte, with arrows indicating the scanning direction. \* correspond to redox peaks arising from decomposition products.

**Note:** DPV scans indicate a reduction event at  $-3.32$  V vs  $\text{Fc}/\text{Fc}^+$ , in line with the reduction of  $\text{Ce}^{\text{III}}$ . Ce oxidation events were observed above  $-0.4$  V vs  $\text{Fc}/\text{Fc}^+$ , and overlapped with ligand oxidations.

**Table S1.** Crystallographic parameters for compounds **2-Ce/Et**, **2-Ce/Pr**, and **2-La/Pr**.

| Identification code                         | <b>2-Ce/Et</b>                                                | <b>2-La/Pr</b>                                                                 | <b>2-Ce/Pr</b>                                                                 |
|---------------------------------------------|---------------------------------------------------------------|--------------------------------------------------------------------------------|--------------------------------------------------------------------------------|
| Empirical formula                           | C <sub>18</sub> H <sub>31</sub> CeOSi <sub>2</sub>            | C <sub>38</sub> H <sub>66</sub> La <sub>2</sub> O <sub>2</sub> Si <sub>4</sub> | C <sub>38</sub> H <sub>66</sub> Ce <sub>2</sub> O <sub>2</sub> Si <sub>4</sub> |
| Formula weight                              | 459.73                                                        | 945.08                                                                         | 947.50                                                                         |
| Temperature/K                               | 177.0                                                         | 173.0                                                                          | 173.0                                                                          |
| Crystal system                              | monoclinic                                                    | monoclinic                                                                     | monoclinic                                                                     |
| Space group                                 | P2 <sub>1</sub> /c                                            | P2/n                                                                           | P2/n                                                                           |
| a/Å                                         | 13.433(2)                                                     | 18.0071(7)                                                                     | 18.043(2)                                                                      |
| b/Å                                         | 11.0399(16)                                                   | 13.8430(6)                                                                     | 13.8611(19)                                                                    |
| c/Å                                         | 14.619(2)                                                     | 18.6821(7)                                                                     | 18.671(3)                                                                      |
| α/°                                         | 90                                                            | 90                                                                             | 90                                                                             |
| β/°                                         | 96.647(5)                                                     | 101.345(2)                                                                     | 100.767(5)                                                                     |
| γ/°                                         | 90                                                            | 90                                                                             | 90                                                                             |
| Volume/Å <sup>3</sup>                       | 2153.4(6)                                                     | 4565.9(3)                                                                      | 4587.3(11)                                                                     |
| Z                                           | 4                                                             | 4                                                                              | 4                                                                              |
| ρ <sub>calc</sub> /cm <sup>3</sup>          | 1.418                                                         | 1.375                                                                          | 1.372                                                                          |
| μ/mm <sup>-1</sup>                          | 2.225                                                         | 1.978                                                                          | 2.091                                                                          |
| F(000)                                      | 932.0                                                         | 1920.0                                                                         | 1928.0                                                                         |
| Crystal size/mm <sup>3</sup>                | 0.2 × 0.18 × 0.17                                             | 0.16 × 0.12 × 0.1                                                              | 0.08 × 0.05 × 0.03                                                             |
| Radiation                                   | MoKα (λ = 0.71073)                                            | MoKα (λ = 0.71073)                                                             | MoKα (λ = 0.71073)                                                             |
| 2θ range for data collection/°              | 5.368 to 55.002                                               | 4.112 to 56.362                                                                | 4.116 to 55.464                                                                |
| Index ranges                                | -17 ≤ h ≤ 17, -14 ≤ k ≤ 14, -18 ≤ l ≤ 18                      | -23 ≤ h ≤ 23, -17 ≤ k ≤ 17, -24 ≤ l ≤ 24                                       | -23 ≤ h ≤ 23, -18 ≤ k ≤ 18, -24 ≤ l ≤ 24                                       |
| Reflections collected                       | 57458                                                         | 208523                                                                         | 125523                                                                         |
| Independent reflections                     | 4948 [R <sub>int</sub> = 0.0555, R <sub>sigma</sub> = 0.0270] | 10533 [R <sub>int</sub> = 0.0562, R <sub>sigma</sub> = 0.0263]                 | 10704 [R <sub>int</sub> = 0.1295, R <sub>sigma</sub> = 0.0702]                 |
| Data/restraints/parameters                  | 4948/9/206                                                    | 10533/36/474                                                                   | 10704/123/493                                                                  |
| Goodness-of-fit on F <sup>2</sup>           | 1.082                                                         | 1.069                                                                          | 1.035                                                                          |
| Final R indexes [I] ≥ 2σ (I)                | R <sub>1</sub> = 0.0184, wR <sub>2</sub> = 0.0463             | R <sub>1</sub> = 0.0226, wR <sub>2</sub> = 0.0529                              | R <sub>1</sub> = 0.0527, wR <sub>2</sub> = 0.1335                              |
| Final R indexes [all data]                  | R <sub>1</sub> = 0.0191, wR <sub>2</sub> = 0.0466             | R <sub>1</sub> = 0.0259, wR <sub>2</sub> = 0.0550                              | R <sub>1</sub> = 0.0948, wR <sub>2</sub> = 0.1583                              |
| Largest diff. peak/hole / e Å <sup>-3</sup> | 0.33/-0.76                                                    | 0.47/-0.40                                                                     | 1.11/-0.71                                                                     |
| <b>CCDC Deposition #</b>                    | <b>2372725</b>                                                | <b>2372726</b>                                                                 | <b>2372727</b>                                                                 |

**Table S2a.** Bond lengths (Å) for **2-Ce/Et**.

| Atom Atom           | Length (Å) | Atom Atom | Length (Å) |
|---------------------|------------|-----------|------------|
| Ce1 O1              | 2.3349(11) | Si2 C13   | 1.8572(16) |
| Ce1 O1 <sup>1</sup> | 2.3600(11) | Si2 C14   | 1.865(2)   |
| Ce1 C1              | 2.7981(15) | Si2 C15   | 1.861(2)   |
| Ce1 C2              | 2.7912(18) | Si2 C16   | 1.868(2)   |
| Ce1 C3              | 2.7974(16) | O1 C17    | 1.415(2)   |
| Ce1 C4              | 2.8040(16) | C1 C2     | 1.404(2)   |
| Ce1 C5              | 2.8179(15) | C1 C5     | 1.418(2)   |
| Ce1 C9              | 2.8274(18) | C2 C3     | 1.402(3)   |
| Ce1 C10             | 2.814(2)   | C3 C4     | 1.398(3)   |
| Ce1 C11             | 2.7982(18) | C4 C5     | 1.431(2)   |

| Atom | Atom | Length (Å) | Atom | Atom | Length (Å) |
|------|------|------------|------|------|------------|
| Ce1  | C12  | 2.8098(16) | C9   | C10  | 1.416(3)   |
| Ce1  | C13  | 2.8401(15) | C9   | C13  | 1.421(2)   |
| Si1  | C5   | 1.8574(16) | C10  | C11  | 1.391(4)   |
| Si1  | C6   | 1.869(2)   | C11  | C12  | 1.394(3)   |
| Si1  | C7   | 1.862(2)   | C12  | C13  | 1.417(2)   |
| Si1  | C8   | 1.869(2)   | C17  | C18  | 1.491(3)   |

<sup>1</sup>1-X,1-Y,1-Z

**Table S2b.** Bond angles (°) for **2-Ce/Et**.

| Atom            | Atom | Atom            | Angle (°) | Atom | Atom | Atom             | Angle (°)  |
|-----------------|------|-----------------|-----------|------|------|------------------|------------|
| O1              | Ce1  | O1 <sup>1</sup> | 71.71(4)  | C11  | Ce1  | C10              | 28.70(7)   |
| O1 <sup>1</sup> | Ce1  | C1              | 135.60(4) | C11  | Ce1  | C12              | 28.79(6)   |
| O1              | Ce1  | C1              | 119.29(4) | C11  | Ce1  | C13              | 48.08(5)   |
| O1 <sup>1</sup> | Ce1  | C2              | 128.59(5) | C12  | Ce1  | C5               | 130.79(5)  |
| O1              | Ce1  | C2              | 90.25(5)  | C12  | Ce1  | C9               | 47.38(5)   |
| O1              | Ce1  | C3              | 80.76(5)  | C12  | Ce1  | C10              | 47.24(6)   |
| O1 <sup>1</sup> | Ce1  | C3              | 99.58(5)  | C12  | Ce1  | C13              | 29.04(5)   |
| O1 <sup>1</sup> | Ce1  | C4              | 88.71(5)  | C5   | Si1  | C6               | 107.02(9)  |
| O1              | Ce1  | C4              | 102.64(5) | C5   | Si1  | C7               | 111.33(9)  |
| O1 <sup>1</sup> | Ce1  | C5              | 108.31(4) | C5   | Si1  | C8               | 110.79(10) |
| O1              | Ce1  | C5              | 129.08(4) | C6   | Si1  | C8               | 109.20(12) |
| O1              | Ce1  | C9              | 134.59(5) | C7   | Si1  | C6               | 109.01(12) |
| O1 <sup>1</sup> | Ce1  | C9              | 115.04(5) | C7   | Si1  | C8               | 109.42(12) |
| O1 <sup>1</sup> | Ce1  | C10             | 88.33(5)  | C13  | Si2  | C14              | 111.78(9)  |
| O1              | Ce1  | C10             | 117.32(6) | C13  | Si2  | C15              | 110.77(9)  |
| O1 <sup>1</sup> | Ce1  | C11             | 88.03(5)  | C13  | Si2  | C16              | 107.20(9)  |
| O1              | Ce1  | C11             | 90.18(6)  | C14  | Si2  | C16              | 108.27(12) |
| O1 <sup>1</sup> | Ce1  | C12             | 114.39(5) | C15  | Si2  | C14              | 109.63(11) |
| O1              | Ce1  | C12             | 87.92(5)  | C15  | Si2  | C16              | 109.10(12) |
| O1              | Ce1  | C13             | 113.11(4) | Ce1  | O1   | Ce1 <sup>1</sup> | 108.29(4)  |
| O1 <sup>1</sup> | Ce1  | C13             | 134.47(4) | C17  | O1   | Ce1 <sup>1</sup> | 112.78(10) |
| C1              | Ce1  | C4              | 47.68(5)  | C17  | O1   | Ce1              | 137.17(11) |
| C1              | Ce1  | C5              | 29.24(5)  | C2   | C1   | Ce1              | 75.18(9)   |
| C1              | Ce1  | C9              | 88.06(5)  | C2   | C1   | C5               | 109.69(15) |
| C1              | Ce1  | C10             | 116.17(6) | C5   | C1   | Ce1              | 76.15(9)   |
| C1              | Ce1  | C12             | 109.10(5) | C1   | C2   | Ce1              | 75.73(10)  |
| C1              | Ce1  | C13             | 83.76(5)  | C3   | C2   | Ce1              | 75.72(10)  |
| C2              | Ce1  | C1              | 29.09(5)  | C3   | C2   | C1               | 107.63(15) |
| C2              | Ce1  | C3              | 29.06(6)  | C2   | C3   | Ce1              | 75.22(10)  |
| C2              | Ce1  | C4              | 47.84(5)  | C4   | C3   | Ce1              | 75.80(9)   |
| C2              | Ce1  | C5              | 48.56(5)  | C4   | C3   | C2               | 108.21(15) |
| C2              | Ce1  | C9              | 111.70(6) | C3   | C4   | Ce1              | 75.28(10)  |
| C2              | Ce1  | C10             | 140.73(6) | C3   | C4   | C5               | 109.19(15) |
| C2              | Ce1  | C11             | 141.17(6) | C5   | C4   | Ce1              | 75.80(9)   |
| C2              | Ce1  | C12             | 112.46(6) | Si1  | C5   | Ce1              | 128.04(7)  |
| C2              | Ce1  | C13             | 96.93(5)  | C1   | C5   | Ce1              | 74.61(8)   |
| C3              | Ce1  | C1              | 47.75(5)  | C1   | C5   | Si1              | 126.63(12) |
| C3              | Ce1  | C4              | 28.91(6)  | C1   | C5   | C4               | 105.29(14) |
| C3              | Ce1  | C5              | 48.49(5)  | C4   | C5   | Ce1              | 74.72(9)   |
| C3              | Ce1  | C9              | 135.74(6) | C4   | C5   | Si1              | 126.12(12) |
| C3              | Ce1  | C10             | 161.86(6) | C10  | C9   | Ce1              | 74.93(11)  |
| C3              | Ce1  | C11             | 165.60(7) | C10  | C9   | C13              | 108.27(17) |

| Atom | Atom | Atom | Angle (°) | Atom | Atom | Atom | Angle (°)  |
|------|------|------|-----------|------|------|------|------------|
| C3   | Ce1  | C12  | 138.62(6) | C13  | C9   | Ce1  | 75.98(9)   |
| C3   | Ce1  | C13  | 125.93(5) | C9   | C10  | Ce1  | 75.99(11)  |
| C4   | Ce1  | C5   | 29.48(5)  | C11  | C10  | Ce1  | 75.02(11)  |
| C4   | Ce1  | C9   | 121.77(5) | C11  | C10  | C9   | 108.23(17) |
| C4   | Ce1  | C10  | 136.58(6) | C10  | C11  | Ce1  | 76.28(11)  |
| C4   | Ce1  | C12  | 156.75(5) | C10  | C11  | C12  | 107.99(17) |
| C4   | Ce1  | C13  | 129.98(5) | C12  | C11  | Ce1  | 76.07(10)  |
| C5   | Ce1  | C9   | 92.98(5)  | C11  | C12  | Ce1  | 75.14(10)  |
| C5   | Ce1  | C13  | 101.94(5) | C11  | C12  | C13  | 109.61(18) |
| C9   | Ce1  | C13  | 29.04(5)  | C13  | C12  | Ce1  | 76.66(9)   |
| C10  | Ce1  | C5   | 113.54(6) | Si2  | C13  | Ce1  | 126.93(7)  |
| C10  | Ce1  | C9   | 29.08(6)  | C9   | C13  | Ce1  | 74.98(9)   |
| C10  | Ce1  | C13  | 47.99(5)  | C9   | C13  | Si2  | 127.73(13) |
| C11  | Ce1  | C1   | 131.42(5) | C12  | C13  | Ce1  | 74.29(9)   |
| C11  | Ce1  | C4   | 165.03(7) | C12  | C13  | Si2  | 124.83(13) |
| C11  | Ce1  | C5   | 140.22(6) | C12  | C13  | C9   | 105.89(16) |
| C11  | Ce1  | C9   | 47.69(6)  | O1   | C17  | C18  | 112.78(16) |

<sup>1</sup>1-X,1-Y,1-Z

**Table S3a.** Bond lengths (Å) for **2-La/Pr**.

| Atom | Atom             | Length (Å) | Atom | Atom             | Length (Å) |
|------|------------------|------------|------|------------------|------------|
| La1  | O1               | 2.3642(10) | La3  | O2 <sup>2</sup>  | 2.3604(10) |
| La1  | O1 <sup>1</sup>  | 2.3642(10) | La3  | O2               | 2.3604(10) |
| La1  | C1               | 2.8189(15) | La3  | C20 <sup>2</sup> | 2.8543(16) |
| La1  | C1 <sup>1</sup>  | 2.8189(15) | La3  | C20              | 2.8543(16) |
| La1  | C2               | 2.8139(15) | La3  | C21              | 2.8373(16) |
| La1  | C2 <sup>1</sup>  | 2.8139(15) | La3  | C21 <sup>2</sup> | 2.8372(16) |
| La1  | C3 <sup>1</sup>  | 2.8439(16) | La3  | C22 <sup>2</sup> | 2.8297(16) |
| La1  | C3               | 2.8438(16) | La3  | C22              | 2.8298(16) |
| La1  | C4               | 2.8632(15) | La3  | C23 <sup>2</sup> | 2.8372(15) |
| La1  | C4 <sup>1</sup>  | 2.8631(15) | La3  | C23              | 2.8371(15) |
| La1  | C5               | 2.8601(15) | La3  | C24              | 2.8708(14) |
| La1  | C5 <sup>1</sup>  | 2.8601(15) | La3  | C24 <sup>2</sup> | 2.8707(14) |
| La2  | O1               | 2.3768(10) | La4  | O2               | 2.4026(11) |
| La2  | O1 <sup>1</sup>  | 2.3768(10) | La4  | O2 <sup>2</sup>  | 2.4026(11) |
| La2  | C9 <sup>1</sup>  | 2.8446(15) | La4  | C28              | 2.8478(17) |
| La2  | C9               | 2.8446(15) | La4  | C28 <sup>2</sup> | 2.8478(17) |
| La2  | C10              | 2.8457(16) | La4  | C29 <sup>2</sup> | 2.8211(16) |
| La2  | C10 <sup>1</sup> | 2.8457(16) | La4  | C29              | 2.8211(16) |
| La2  | C11              | 2.8324(16) | La4  | C30              | 2.8214(16) |
| La2  | C11 <sup>1</sup> | 2.8323(16) | La4  | C30 <sup>2</sup> | 2.8214(16) |
| La2  | C12              | 2.8251(15) | La4  | C31 <sup>2</sup> | 2.8446(16) |
| La2  | C12 <sup>1</sup> | 2.8251(15) | La4  | C31              | 2.8446(16) |
| La2  | C13 <sup>1</sup> | 2.8452(14) | La4  | C32              | 2.8770(16) |
| La2  | C13              | 2.8452(14) | La4  | C32 <sup>2</sup> | 2.8771(16) |
| Si1  | C5               | 1.8641(17) | Si3  | C24              | 1.8617(16) |
| Si1  | C6               | 1.866(2)   | Si3  | C25              | 1.866(2)   |
| Si1  | C7               | 1.864(2)   | Si3  | C26              | 1.863(2)   |
| Si1  | C8               | 1.859(2)   | Si3  | C27              | 1.8627(19) |
| Si2  | C13              | 1.8622(15) | Si4  | C32              | 1.8554(18) |
| Si2  | C14              | 1.865(2)   | Si4  | C33              | 1.870(3)   |
| Si2  | C15              | 1.868(2)   | Si4  | C34              | 1.848(3)   |
| Si2  | C16              | 1.8655(19) | Si4  | C35              | 1.861(3)   |



| Atom Atom | Length (Å) | Atom Atom | Length (Å) |
|-----------|------------|-----------|------------|
| O1 C17A   | 1.399(3)   | Si4 C33A  | 1.778(14)  |
| O1 C17B   | 1.395(3)   | Si4 C34A  | 1.848(13)  |
| C1 C2     | 1.409(2)   | Si4 C35A  | 1.872(15)  |
| C1 C5     | 1.427(2)   | O2 C36    | 1.4240(18) |
| C2 C3     | 1.403(3)   | C20 C21   | 1.406(2)   |
| C3 C4     | 1.406(2)   | C20 C24   | 1.420(2)   |
| C4 C5     | 1.423(2)   | C21 C22   | 1.398(3)   |
| C9 C10    | 1.405(2)   | C22 C23   | 1.402(2)   |
| C9 C13    | 1.420(2)   | C23 C24   | 1.420(2)   |
| C10 C11   | 1.403(3)   | C28 C29   | 1.402(3)   |
| C11 C12   | 1.405(2)   | C28 C32   | 1.418(2)   |
| C12 C13   | 1.426(2)   | C29 C30   | 1.401(3)   |
| C18 C17A  | 1.523(4)   | C30 C31   | 1.400(3)   |
| C18 C17B  | 1.497(4)   | C31 C32   | 1.421(2)   |
| C19 C17A  | 1.490(4)   | C36 C37   | 1.511(3)   |
| C19 C17B  | 1.514(4)   | C36 C38   | 1.519(2)   |

<sup>1</sup>3/2-X,+Y,3/2-Z; <sup>2</sup>3/2-X,+Y,1/2-Z

**Table S3b.** Bond angles (°) for **2-La/Pr**.

| Atom Atom Atom                      | Angle (°) | Atom Atom Atom                        | Angle (°) |
|-------------------------------------|-----------|---------------------------------------|-----------|
| O1 La1 O1 <sup>1</sup>              | 73.19(5)  | C18 C17B C19                          | 113.4(3)  |
| O1 <sup>1</sup> La1 C1 <sup>1</sup> | 123.25(4) | C19 C17B La1                          | 126.9(2)  |
| O1 La1 C1                           | 123.25(4) | O2 <sup>2</sup> La3 O2                | 73.17(5)  |
| O1 La1 C1 <sup>1</sup>              | 131.03(4) | O2 <sup>2</sup> La3 C20               | 121.58(4) |
| O1 <sup>1</sup> La1 C1              | 131.03(4) | O2 La3 C20 <sup>2</sup>               | 121.58(4) |
| O1 <sup>1</sup> La1 C2 <sup>1</sup> | 94.60(4)  | O2 La3 C20                            | 132.71(4) |
| O1 La1 C2 <sup>1</sup>              | 123.75(5) | O2 <sup>2</sup> La3 C20 <sup>2</sup>  | 132.71(4) |
| O1 <sup>1</sup> La1 C2              | 123.75(5) | O2 <sup>2</sup> La3 C21 <sup>2</sup>  | 129.19(5) |
| O1 La1 C2                           | 94.60(4)  | O2 La3 C21                            | 129.19(5) |
| O1 <sup>1</sup> La1 C3 <sup>1</sup> | 86.98(4)  | O2 La3 C21 <sup>2</sup>               | 92.98(5)  |
| O1 <sup>1</sup> La1 C3              | 95.06(5)  | O2 <sup>2</sup> La3 C21               | 92.98(5)  |
| O1 La1 C3 <sup>1</sup>              | 95.06(5)  | O2 <sup>2</sup> La3 C22 <sup>2</sup>  | 100.67(5) |
| O1 La1 C3                           | 86.98(4)  | O2 <sup>2</sup> La3 C22               | 81.91(4)  |
| O1 La1 C4                           | 109.05(4) | O2 La3 C22                            | 100.67(5) |
| O1 La1 C4 <sup>1</sup>              | 84.48(4)  | O2 La3 C22 <sup>2</sup>               | 81.90(4)  |
| O1 <sup>1</sup> La1 C4 <sup>1</sup> | 109.05(4) | O2 <sup>2</sup> La3 C23               | 102.39(4) |
| O1 <sup>1</sup> La1 C4              | 84.48(4)  | O2 La3 C23                            | 87.61(4)  |
| O1 <sup>1</sup> La1 C5              | 104.28(4) | O2 <sup>2</sup> La3 C23 <sup>2</sup>  | 87.61(4)  |
| O1 <sup>1</sup> La1 C5 <sup>1</sup> | 134.67(4) | O2 La3 C23 <sup>2</sup>               | 102.39(4) |
| O1 La1 C5                           | 134.67(4) | O2 <sup>2</sup> La3 C24               | 129.03(4) |
| O1 La1 C5 <sup>1</sup>              | 104.28(4) | O2 <sup>2</sup> La3 C24 <sup>2</sup>  | 105.07(4) |
| C1 La1 C1 <sup>1</sup>              | 82.77(7)  | O2 La3 C24 <sup>2</sup>               | 129.03(4) |
| C1 <sup>1</sup> La1 C3 <sup>1</sup> | 47.36(5)  | O2 La3 C24                            | 105.07(4) |
| C1 La1 C3 <sup>1</sup>              | 130.11(5) | C20 La3 C20 <sup>2</sup>              | 83.10(7)  |
| C1 <sup>1</sup> La1 C3              | 130.11(5) | C20 <sup>2</sup> La3 C24 <sup>2</sup> | 28.72(4)  |
| C1 La1 C3                           | 47.36(5)  | C20 La3 C24                           | 28.72(4)  |
| C1 <sup>1</sup> La1 C4              | 117.73(5) | C20 La3 C24 <sup>2</sup>              | 92.73(5)  |
| C1 <sup>1</sup> La1 C4 <sup>1</sup> | 47.12(5)  | C20 <sup>2</sup> La3 C24              | 92.73(5)  |
| C1 La1 C4                           | 47.12(5)  | C21 La3 C20 <sup>2</sup>              | 103.92(5) |
| C1 La1 C4 <sup>1</sup>              | 117.73(5) | C21 La3 C20                           | 28.59(5)  |
| C1 <sup>1</sup> La1 C5              | 89.22(5)  | C21 <sup>2</sup> La3 C20 <sup>2</sup> | 28.59(5)  |
| C1 La1 C5 <sup>1</sup>              | 89.22(5)  | C21 <sup>2</sup> La3 C20              | 103.92(5) |
| C1 <sup>1</sup> La1 C5 <sup>1</sup> | 29.09(4)  | C21 <sup>2</sup> La3 C21              | 129.59(8) |

| Atom            | Atom | Atom             | Angle (°) | Atom             | Atom | Atom             | Angle (°) |
|-----------------|------|------------------|-----------|------------------|------|------------------|-----------|
| C1              | La1  | C5               | 29.10(5)  | C21              | La3  | C24              | 47.58(4)  |
| C2 <sup>1</sup> | La1  | C1               | 106.31(5) | C21 <sup>2</sup> | La3  | C24 <sup>2</sup> | 47.58(4)  |
| C2 <sup>1</sup> | La1  | C1 <sup>1</sup>  | 28.96(5)  | C21 <sup>2</sup> | La3  | C24              | 101.69(5) |
| C2              | La1  | C1 <sup>1</sup>  | 106.31(5) | C21              | La3  | C24 <sup>2</sup> | 101.69(5) |
| C2              | La1  | C1               | 28.96(5)  | C22 <sup>2</sup> | La3  | C20 <sup>2</sup> | 47.04(5)  |
| C2              | La1  | C2 <sup>1</sup>  | 133.35(7) | C22              | La3  | C20 <sup>2</sup> | 129.81(5) |
| C2              | La1  | C3               | 28.71(5)  | C22              | La3  | C20              | 47.04(5)  |
| C2 <sup>1</sup> | La1  | C3               | 149.27(5) | C22 <sup>2</sup> | La3  | C20              | 129.81(5) |
| C2 <sup>1</sup> | La1  | C3 <sup>1</sup>  | 28.71(5)  | C22              | La3  | C21 <sup>2</sup> | 148.74(5) |
| C2              | La1  | C3 <sup>1</sup>  | 149.27(5) | C22              | La3  | C21              | 28.56(5)  |
| C2 <sup>1</sup> | La1  | C4               | 124.49(5) | C22 <sup>2</sup> | La3  | C21 <sup>2</sup> | 28.56(5)  |
| C2              | La1  | C4 <sup>1</sup>  | 124.49(5) | C22 <sup>2</sup> | La3  | C21              | 148.74(5) |
| C2 <sup>1</sup> | La1  | C4 <sup>1</sup>  | 47.17(5)  | C22 <sup>2</sup> | La3  | C22              | 176.83(7) |
| C2              | La1  | C4               | 47.17(5)  | C22 <sup>2</sup> | La3  | C23              | 150.64(5) |
| C2 <sup>1</sup> | La1  | C5               | 101.56(5) | C22 <sup>2</sup> | La3  | C23 <sup>2</sup> | 28.66(5)  |
| C2 <sup>1</sup> | La1  | C5 <sup>1</sup>  | 48.03(5)  | C22              | La3  | C23 <sup>2</sup> | 150.64(5) |
| C2              | La1  | C5               | 48.03(5)  | C22              | La3  | C23              | 28.66(5)  |
| C2              | La1  | C5 <sup>1</sup>  | 101.56(5) | C22              | La3  | C24 <sup>2</sup> | 130.00(5) |
| C3              | La1  | C3 <sup>1</sup>  | 177.46(7) | C22              | La3  | C24              | 47.67(5)  |
| C3              | La1  | C4               | 28.52(5)  | C22 <sup>2</sup> | La3  | C24              | 130.00(5) |
| C3              | La1  | C4 <sup>1</sup>  | 150.72(5) | C22 <sup>2</sup> | La3  | C24 <sup>2</sup> | 47.68(5)  |
| C3 <sup>1</sup> | La1  | C4 <sup>1</sup>  | 28.52(5)  | C23              | La3  | C20              | 46.84(5)  |
| C3 <sup>1</sup> | La1  | C4               | 150.72(5) | C23 <sup>2</sup> | La3  | C20 <sup>2</sup> | 46.84(5)  |
| C3 <sup>1</sup> | La1  | C5               | 130.27(5) | C23 <sup>2</sup> | La3  | C20              | 121.53(5) |
| C3 <sup>1</sup> | La1  | C5 <sup>1</sup>  | 47.74(5)  | C23              | La3  | C20 <sup>2</sup> | 121.53(5) |
| C3              | La1  | C5 <sup>1</sup>  | 130.27(5) | C23 <sup>2</sup> | La3  | C21              | 126.17(5) |
| C3              | La1  | C5               | 47.74(5)  | C23              | La3  | C21 <sup>2</sup> | 126.17(5) |
| C4 <sup>1</sup> | La1  | C4               | 163.51(6) | C23              | La3  | C21              | 47.01(5)  |
| C5              | La1  | C4 <sup>1</sup>  | 134.97(5) | C23 <sup>2</sup> | La3  | C21 <sup>2</sup> | 47.01(5)  |
| C5              | La1  | C4               | 28.80(4)  | C23              | La3  | C23 <sup>2</sup> | 167.64(7) |
| C5 <sup>1</sup> | La1  | C4 <sup>1</sup>  | 28.80(4)  | C23              | La3  | C24              | 28.81(4)  |
| C5 <sup>1</sup> | La1  | C4               | 134.97(5) | C23 <sup>2</sup> | La3  | C24              | 139.19(5) |
| C5 <sup>1</sup> | La1  | C5               | 107.49(6) | C23              | La3  | C24 <sup>2</sup> | 139.19(5) |
| O1              | La2  | O1 <sup>1</sup>  | 72.74(5)  | C23 <sup>2</sup> | La3  | C24 <sup>2</sup> | 28.81(4)  |
| O1 <sup>1</sup> | La2  | C9               | 85.38(4)  | C24 <sup>2</sup> | La3  | C24              | 112.71(6) |
| O1 <sup>1</sup> | La2  | C9 <sup>1</sup>  | 105.48(4) | O2               | La4  | O2 <sup>2</sup>  | 71.69(5)  |
| O1              | La2  | C9 <sup>1</sup>  | 85.38(4)  | O2               | La4  | C28              | 134.85(5) |
| O1              | La2  | C9               | 105.49(4) | O2 <sup>2</sup>  | La4  | C28 <sup>2</sup> | 134.85(5) |
| O1              | La2  | C10 <sup>1</sup> | 96.53(5)  | O2 <sup>2</sup>  | La4  | C28              | 120.06(5) |
| O1              | La2  | C10              | 83.81(4)  | O2               | La4  | C28 <sup>2</sup> | 120.06(5) |
| O1 <sup>1</sup> | La2  | C10 <sup>1</sup> | 83.81(4)  | O2 <sup>2</sup>  | La4  | C29              | 91.56(5)  |
| O1 <sup>1</sup> | La2  | C10              | 96.52(5)  | O2               | La4  | C29 <sup>2</sup> | 91.56(5)  |
| O1              | La2  | C11 <sup>1</sup> | 125.12(5) | O2               | La4  | C29              | 127.21(5) |
| O1 <sup>1</sup> | La2  | C11              | 125.12(5) | O2 <sup>2</sup>  | La4  | C29 <sup>2</sup> | 127.21(5) |
| O1              | La2  | C11              | 92.75(4)  | O2 <sup>2</sup>  | La4  | C30              | 82.99(5)  |
| O1 <sup>1</sup> | La2  | C11 <sup>1</sup> | 92.75(4)  | O2               | La4  | C30 <sup>2</sup> | 82.99(5)  |
| O1              | La2  | C12 <sup>1</sup> | 131.73(4) | O2               | La4  | C30              | 98.52(5)  |
| O1 <sup>1</sup> | La2  | C12              | 131.73(4) | O2 <sup>2</sup>  | La4  | C30 <sup>2</sup> | 98.52(5)  |
| O1 <sup>1</sup> | La2  | C12 <sup>1</sup> | 121.38(4) | O2               | La4  | C31              | 88.58(5)  |
| O1              | La2  | C12              | 121.38(4) | O2 <sup>2</sup>  | La4  | C31 <sup>2</sup> | 88.58(5)  |
| O1 <sup>1</sup> | La2  | C13 <sup>1</sup> | 131.51(4) | O2 <sup>2</sup>  | La4  | C31              | 105.23(5) |
| O1              | La2  | C13              | 131.51(4) | O2               | La4  | C31 <sup>2</sup> | 105.23(5) |
| O1 <sup>1</sup> | La2  | C13              | 104.70(4) | O2               | La4  | C32 <sup>2</sup> | 130.60(4) |

| Atom             | Atom | Atom             | Angle (°)  | Atom             | Atom | Atom             | Angle (°)  |
|------------------|------|------------------|------------|------------------|------|------------------|------------|
| O1               | La2  | C13 <sup>1</sup> | 104.70(4)  | O2               | La4  | C32              | 108.39(4)  |
| C9               | La2  | C9 <sup>1</sup>  | 166.71(6)  | O2 <sup>2</sup>  | La4  | C32              | 130.59(4)  |
| C9               | La2  | C10 <sup>1</sup> | 151.31(5)  | O2 <sup>2</sup>  | La4  | C32 <sup>2</sup> | 108.39(4)  |
| C9 <sup>1</sup>  | La2  | C10 <sup>1</sup> | 28.59(5)   | C28              | La4  | C28 <sup>2</sup> | 83.87(8)   |
| C9               | La2  | C10              | 28.59(5)   | C28              | La4  | C32              | 28.67(5)   |
| C9 <sup>1</sup>  | La2  | C10              | 151.31(5)  | C28              | La4  | C32 <sup>2</sup> | 89.47(5)   |
| C9               | La2  | C13 <sup>1</sup> | 138.04(5)  | C28 <sup>2</sup> | La4  | C32              | 89.47(5)   |
| C9               | La2  | C13              | 28.91(4)   | C28 <sup>2</sup> | La4  | C32 <sup>2</sup> | 28.67(5)   |
| C9 <sup>1</sup>  | La2  | C13 <sup>1</sup> | 28.91(4)   | C29 <sup>2</sup> | La4  | C28              | 107.33(6)  |
| C9 <sup>1</sup>  | La2  | C13              | 138.04(4)  | C29 <sup>2</sup> | La4  | C28 <sup>2</sup> | 28.63(6)   |
| C10              | La2  | C10 <sup>1</sup> | 179.59(7)  | C29              | La4  | C28              | 28.63(6)   |
| C11 <sup>1</sup> | La2  | C9 <sup>1</sup>  | 47.07(5)   | C29              | La4  | C28 <sup>2</sup> | 107.33(6)  |
| C11 <sup>1</sup> | La2  | C9               | 126.26(5)  | C29              | La4  | C29 <sup>2</sup> | 134.12(9)  |
| C11              | La2  | C9 <sup>1</sup>  | 126.26(5)  | C29              | La4  | C30 <sup>2</sup> | 149.79(6)  |
| C11              | La2  | C9               | 47.07(5)   | C29 <sup>2</sup> | La4  | C30              | 149.79(6)  |
| C11              | La2  | C10 <sup>1</sup> | 151.07(5)  | C29              | La4  | C30              | 28.75(6)   |
| C11 <sup>1</sup> | La2  | C10 <sup>1</sup> | 28.60(5)   | C29 <sup>2</sup> | La4  | C30 <sup>2</sup> | 28.75(6)   |
| C11              | La2  | C10              | 28.60(5)   | C29 <sup>2</sup> | La4  | C31 <sup>2</sup> | 47.04(5)   |
| C11 <sup>1</sup> | La2  | C10              | 151.07(5)  | C29              | La4  | C31 <sup>2</sup> | 124.54(6)  |
| C11 <sup>1</sup> | La2  | C11              | 134.46(7)  | C29 <sup>2</sup> | La4  | C31              | 124.54(6)  |
| C11 <sup>1</sup> | La2  | C13              | 103.26(5)  | C29              | La4  | C31              | 47.04(5)   |
| C11              | La2  | C13              | 47.94(4)   | C29 <sup>2</sup> | La4  | C32              | 102.13(5)  |
| C11 <sup>1</sup> | La2  | C13 <sup>1</sup> | 47.94(4)   | C29              | La4  | C32              | 47.57(5)   |
| C11              | La2  | C13 <sup>1</sup> | 103.26(5)  | C29              | La4  | C32 <sup>2</sup> | 102.13(5)  |
| C12              | La2  | C9 <sup>1</sup>  | 120.68(5)  | C29 <sup>2</sup> | La4  | C32 <sup>2</sup> | 47.57(5)   |
| C12 <sup>1</sup> | La2  | C9               | 120.68(5)  | C30 <sup>2</sup> | La4  | C28              | 130.99(6)  |
| C12 <sup>1</sup> | La2  | C9 <sup>1</sup>  | 47.10(5)   | C30              | La4  | C28              | 47.17(6)   |
| C12              | La2  | C9               | 47.10(5)   | C30 <sup>2</sup> | La4  | C28 <sup>2</sup> | 47.17(6)   |
| C12 <sup>1</sup> | La2  | C10 <sup>1</sup> | 47.24(5)   | C30              | La4  | C28 <sup>2</sup> | 130.99(6)  |
| C12              | La2  | C10 <sup>1</sup> | 132.34(5)  | C30 <sup>2</sup> | La4  | C30              | 178.15(8)  |
| C12              | La2  | C10              | 47.24(5)   | C30              | La4  | C31 <sup>2</sup> | 150.84(5)  |
| C12 <sup>1</sup> | La2  | C10              | 132.34(5)  | C30 <sup>2</sup> | La4  | C31 <sup>2</sup> | 28.60(5)   |
| C12              | La2  | C11              | 28.75(5)   | C30              | La4  | C31              | 28.60(5)   |
| C12              | La2  | C11 <sup>1</sup> | 107.85(5)  | C30 <sup>2</sup> | La4  | C31              | 150.84(5)  |
| C12 <sup>1</sup> | La2  | C11 <sup>1</sup> | 28.75(5)   | C30              | La4  | C32 <sup>2</sup> | 130.87(6)  |
| C12 <sup>1</sup> | La2  | C11              | 107.85(5)  | C30 <sup>2</sup> | La4  | C32              | 130.87(6)  |
| C12 <sup>1</sup> | La2  | C12              | 85.10(7)   | C30 <sup>2</sup> | La4  | C32 <sup>2</sup> | 47.66(5)   |
| C12              | La2  | C13              | 29.12(4)   | C30              | La4  | C32              | 47.66(5)   |
| C12 <sup>1</sup> | La2  | C13              | 92.01(5)   | C31 <sup>2</sup> | La4  | C28              | 117.78(5)  |
| C12 <sup>1</sup> | La2  | C13 <sup>1</sup> | 29.12(4)   | C31              | La4  | C28              | 46.80(5)   |
| C12              | La2  | C13 <sup>1</sup> | 92.01(5)   | C31 <sup>2</sup> | La4  | C28 <sup>2</sup> | 46.80(5)   |
| C13 <sup>1</sup> | La2  | C10 <sup>1</sup> | 47.86(4)   | C31              | La4  | C28 <sup>2</sup> | 117.78(5)  |
| C13              | La2  | C10 <sup>1</sup> | 131.83(5)  | C31              | La4  | C31 <sup>2</sup> | 163.12(7)  |
| C13 <sup>1</sup> | La2  | C10              | 131.83(5)  | C31              | La4  | C32 <sup>2</sup> | 134.56(5)  |
| C13              | La2  | C10              | 47.86(4)   | C31 <sup>2</sup> | La4  | C32 <sup>2</sup> | 28.76(5)   |
| C13 <sup>1</sup> | La2  | C13              | 110.62(6)  | C31              | La4  | C32              | 28.76(5)   |
| C5               | Si1  | C6               | 114.54(8)  | C31 <sup>2</sup> | La4  | C32              | 134.56(5)  |
| C7               | Si1  | C5               | 107.40(9)  | C32              | La4  | C32 <sup>2</sup> | 106.83(7)  |
| C7               | Si1  | C6               | 107.96(11) | C24              | Si3  | C25              | 108.62(9)  |
| C8               | Si1  | C5               | 108.55(10) | C24              | Si3  | C26              | 109.23(9)  |
| C8               | Si1  | C6               | 107.89(12) | C24              | Si3  | C27              | 111.92(8)  |
| C8               | Si1  | C7               | 110.50(14) | C26              | Si3  | C25              | 109.38(12) |
| C13              | Si2  | C14              | 108.40(9)  | C27              | Si3  | C25              | 109.28(11) |

| Atom | Atom | Atom | Angle (°)  | Atom | Atom | Atom | Angle (°)  |
|------|------|------|------------|------|------|------|------------|
| C13  | Si2  | C15  | 107.59(8)  | C27  | Si3  | C26  | 108.39(11) |
| C13  | Si2  | C16  | 113.76(8)  | C32  | Si4  | C33  | 109.89(12) |
| C14  | Si2  | C15  | 111.38(11) | C32  | Si4  | C35  | 113.27(11) |
| C14  | Si2  | C16  | 108.02(9)  | C32  | Si4  | C35A | 102.2(6)   |
| C16  | Si2  | C15  | 107.74(10) | C34  | Si4  | C32  | 109.77(12) |
| La1  | O1   | La2  | 107.03(4)  | C34  | Si4  | C33  | 107.9(2)   |
| C17A | O1   | La1  | 143.9(2)   | C34  | Si4  | C35  | 108.2(2)   |
| C17A | O1   | La2  | 109.1(2)   | C35  | Si4  | C33  | 107.56(19) |
| C17B | O1   | La1  | 110.4(2)   | C33A | Si4  | C32  | 108.4(6)   |
| C17B | O1   | La2  | 142.5(3)   | C33A | Si4  | C34A | 122.0(11)  |
| C2   | C1   | La1  | 75.32(9)   | C33A | Si4  | C35A | 112.2(11)  |
| C2   | C1   | C5   | 109.07(15) | C34A | Si4  | C32  | 103.2(6)   |
| C5   | C1   | La1  | 77.05(9)   | C34A | Si4  | C35A | 106.7(11)  |
| C1   | C2   | La1  | 75.71(9)   | La3  | O2   | La4  | 107.57(4)  |
| C3   | C2   | La1  | 76.83(9)   | C36  | O2   | La3  | 144.19(10) |
| C3   | C2   | C1   | 107.99(15) | C36  | O2   | La4  | 108.24(9)  |
| C2   | C3   | La1  | 74.46(9)   | C21  | C20  | La3  | 75.03(9)   |
| C2   | C3   | C4   | 107.95(15) | C21  | C20  | C24  | 109.16(15) |
| C4   | C3   | La1  | 76.50(9)   | C24  | C20  | La3  | 76.28(9)   |
| C3   | C4   | La1  | 74.97(9)   | C20  | C21  | La3  | 76.38(9)   |
| C3   | C4   | C5   | 109.32(15) | C22  | C21  | La3  | 75.42(10)  |
| C5   | C4   | La1  | 75.48(9)   | C22  | C21  | C20  | 108.02(15) |
| Si1  | C5   | La1  | 124.50(7)  | C21  | C22  | La3  | 76.02(9)   |
| C1   | C5   | La1  | 73.85(9)   | C21  | C22  | C23  | 107.84(15) |
| C1   | C5   | Si1  | 126.47(12) | C23  | C22  | La3  | 75.96(9)   |
| C4   | C5   | La1  | 75.72(9)   | C22  | C23  | La3  | 75.38(9)   |
| C4   | C5   | Si1  | 126.87(12) | C22  | C23  | C24  | 109.42(15) |
| C4   | C5   | C1   | 105.66(14) | C24  | C23  | La3  | 76.91(8)   |
| C10  | C9   | La2  | 75.75(9)   | Si3  | C24  | La3  | 124.70(7)  |
| C10  | C9   | C13  | 109.56(14) | C20  | C24  | La3  | 74.99(8)   |
| C13  | C9   | La2  | 75.57(8)   | C20  | C24  | Si3  | 127.15(12) |
| C9   | C10  | La2  | 75.66(9)   | C20  | C24  | C23  | 105.57(14) |
| C11  | C10  | La2  | 75.17(9)   | C23  | C24  | La3  | 74.28(8)   |
| C11  | C10  | C9   | 107.69(14) | C23  | C24  | Si3  | 126.27(12) |
| C10  | C11  | La2  | 76.23(9)   | C29  | C28  | La4  | 74.63(10)  |
| C10  | C11  | C12  | 108.08(14) | C29  | C28  | C32  | 109.22(17) |
| C12  | C11  | La2  | 75.34(9)   | C32  | C28  | La4  | 76.81(9)   |
| C11  | C12  | La2  | 75.91(9)   | C28  | C29  | La4  | 76.74(10)  |
| C11  | C12  | C13  | 109.17(14) | C30  | C29  | La4  | 75.64(10)  |
| C13  | C12  | La2  | 76.22(8)   | C30  | C29  | C28  | 108.06(17) |
| Si2  | C13  | La2  | 125.29(7)  | C29  | C30  | La4  | 75.61(10)  |
| C9   | C13  | La2  | 75.52(8)   | C31  | C30  | La4  | 76.62(9)   |
| C9   | C13  | Si2  | 126.48(12) | C31  | C30  | C29  | 107.69(17) |
| C9   | C13  | C12  | 105.50(13) | C30  | C31  | La4  | 74.78(10)  |
| C12  | C13  | La2  | 74.66(8)   | C30  | C31  | C32  | 109.45(17) |
| C12  | C13  | Si2  | 126.67(12) | C32  | C31  | La4  | 76.89(9)   |
| O1   | C17A | La2  | 45.91(15)  | Si4  | C32  | La4  | 128.40(7)  |
| O1   | C17A | C18  | 111.1(3)   | C28  | C32  | La4  | 74.52(9)   |
| O1   | C17A | C19  | 113.6(3)   | C28  | C32  | Si4  | 126.25(14) |
| C18  | C17A | La2  | 125.70(19) | C28  | C32  | C31  | 105.58(16) |
| C19  | C17A | La2  | 121.01(19) | C31  | C32  | La4  | 74.36(9)   |
| C19  | C17A | C18  | 113.3(3)   | C31  | C32  | Si4  | 126.27(13) |
| O1   | C17B | La1  | 44.94(17)  | O2   | C36  | C37  | 111.50(14) |

| Atom | Atom | Atom | Angle (°) | Atom | Atom | Atom | Angle (°)  |
|------|------|------|-----------|------|------|------|------------|
| O1   | C17B | C18  | 112.9(3)  | O2   | C36  | C38  | 110.88(14) |
| O1   | C17B | C19  | 112.3(3)  | C37  | C36  | C38  | 111.81(15) |
| C18  | C17B | La1  | 119.7(2)  |      |      |      |            |

<sup>1</sup>3/2-X,+Y,3/2-Z; <sup>2</sup>3/2-X,+Y,1/2-Z

**Table S4a.** Bond lengths (Å) for **2-Ce/Pr**.

| Atom | Atom             | Length/Å  | Atom | Atom              | Length/Å  |
|------|------------------|-----------|------|-------------------|-----------|
| Ce1  | O1 <sup>1</sup>  | 2.339(4)  | Ce3  | O2 <sup>2</sup>   | 2.339(4)  |
| Ce1  | O1               | 2.339(4)  | Ce3  | O2                | 2.339(4)  |
| Ce1  | C1               | 2.786(6)  | Ce3  | C00S <sup>2</sup> | 2.857(6)  |
| Ce1  | C1 <sup>1</sup>  | 2.786(6)  | Ce3  | C00S              | 2.857(6)  |
| Ce1  | C2               | 2.785(6)  | Ce3  | C20               | 2.828(6)  |
| Ce1  | C2 <sup>1</sup>  | 2.785(6)  | Ce3  | C20 <sup>2</sup>  | 2.828(6)  |
| Ce1  | C3               | 2.805(6)  | Ce3  | C21               | 2.789(6)  |
| Ce1  | C3 <sup>1</sup>  | 2.805(6)  | Ce3  | C21 <sup>2</sup>  | 2.789(6)  |
| Ce1  | C4 <sup>1</sup>  | 2.825(6)  | Ce3  | C22               | 2.783(6)  |
| Ce1  | C4               | 2.825(6)  | Ce3  | C22 <sup>2</sup>  | 2.783(6)  |
| Ce1  | C5 <sup>1</sup>  | 2.847(6)  | Ce3  | C23               | 2.805(6)  |
| Ce1  | C5               | 2.847(6)  | Ce3  | C23 <sup>2</sup>  | 2.805(6)  |
| Ce2  | O1               | 2.347(4)  | Ce4  | O2 <sup>2</sup>   | 2.361(4)  |
| Ce2  | O1 <sup>1</sup>  | 2.347(4)  | Ce4  | O2                | 2.361(4)  |
| Ce2  | C9 <sup>1</sup>  | 2.814(6)  | Ce4  | C27 <sup>2</sup>  | 2.808(7)  |
| Ce2  | C9               | 2.814(6)  | Ce4  | C27               | 2.808(7)  |
| Ce2  | C10              | 2.810(6)  | Ce4  | C28 <sup>2</sup>  | 2.772(6)  |
| Ce2  | C10 <sup>1</sup> | 2.810(6)  | Ce4  | C28               | 2.772(6)  |
| Ce2  | C11 <sup>1</sup> | 2.797(6)  | Ce4  | C29               | 2.785(7)  |
| Ce2  | C11              | 2.797(6)  | Ce4  | C29 <sup>2</sup>  | 2.784(7)  |
| Ce2  | C12 <sup>1</sup> | 2.790(6)  | Ce4  | C30 <sup>2</sup>  | 2.805(7)  |
| Ce2  | C12              | 2.790(6)  | Ce4  | C30               | 2.805(7)  |
| Ce2  | C13 <sup>1</sup> | 2.829(6)  | Ce4  | C31               | 2.847(6)  |
| Ce2  | C13              | 2.829(6)  | Ce4  | C31 <sup>2</sup>  | 2.847(6)  |
| Si1  | C5               | 1.855(7)  | Si3  | C00S              | 1.851(6)  |
| Si1  | C6               | 1.853(8)  | Si3  | C24               | 1.856(9)  |
| Si1  | C7               | 1.844(9)  | Si3  | C25               | 1.835(8)  |
| Si1  | C8               | 1.845(8)  | Si3  | C26               | 1.857(8)  |
| Si2  | C13              | 1.853(6)  | Si4  | C31               | 1.859(7)  |
| Si2  | C14              | 1.851(8)  | Si4  | C32               | 1.814(13) |
| Si2  | C15              | 1.848(7)  | Si4  | C33               | 1.865(14) |
| Si2  | C16              | 1.870(8)  | Si4  | C34               | 1.841(13) |
| O1   | C17              | 1.398(12) | Si4  | C32A              | 1.81(2)   |
| O1   | C17A             | 1.408(11) | Si4  | C33A              | 1.87(2)   |
| C1   | C2               | 1.405(9)  | Si4  | C34A              | 1.797(19) |
| C1   | C5               | 1.419(9)  | O2   | C35               | 1.414(7)  |
| C2   | C3               | 1.389(10) | C00S | C20               | 1.423(9)  |
| C3   | C4               | 1.397(9)  | C00S | C23               | 1.448(9)  |
| C4   | C5               | 1.418(8)  | C20  | C21               | 1.394(9)  |
| C9   | C10              | 1.394(9)  | C21  | C22               | 1.378(10) |
| C9   | C13              | 1.422(8)  | C22  | C23               | 1.380(10) |
| C10  | C11              | 1.394(9)  | C27  | C28               | 1.338(10) |
| C11  | C12              | 1.403(9)  | C27  | C31               | 1.410(9)  |
| C12  | C13              | 1.418(8)  | C28  | C29               | 1.402(11) |
| C17  | C18              | 1.50(3)   | C29  | C30               | 1.401(10) |
| C17  | C19              | 1.47(2)   | C30  | C31               | 1.399(9)  |

| Atom Atom | Length/Å | Atom Atom | Length/Å  |
|-----------|----------|-----------|-----------|
| C17A C18A | 1.51(3)  | C35 C36   | 1.475(10) |
| C17A C19A | 1.49(2)  | C35 C37   | 1.509(10) |

<sup>1</sup>/<sub>3</sub>-2-X,+Y,1/2-Z; <sup>2</sup>/<sub>1</sub>-2-X,+Y,1/2-Z

**Table S4b.** Bond angles (°) for **2-Ce/Pr**.

| Atom Atom Atom                      | Angle (°)  | Atom Atom Atom                         | Angle (°)  |
|-------------------------------------|------------|----------------------------------------|------------|
| O1 <sup>1</sup> Ce1 O1              | 72.56(19)  | O2 Ce3 C00S                            | 129.91(16) |
| O1 Ce1 C1 <sup>1</sup>              | 131.65(17) | O2 <sup>2</sup> Ce3 C00S               | 105.63(16) |
| O1 <sup>1</sup> Ce1 C1 <sup>1</sup> | 123.54(17) | O2 <sup>2</sup> Ce3 C00S <sup>2</sup>  | 129.90(16) |
| O1 Ce1 C1                           | 123.55(17) | O2 Ce3 C00S <sup>2</sup>               | 105.63(16) |
| O1 <sup>1</sup> Ce1 C1              | 131.65(17) | O2 <sup>2</sup> Ce3 C20                | 133.41(17) |
| O1 Ce1 C2 <sup>1</sup>              | 124.56(19) | O2 Ce3 C20                             | 122.04(18) |
| O1 <sup>1</sup> Ce1 C2 <sup>1</sup> | 94.57(18)  | O2 Ce3 C20 <sup>2</sup>                | 133.41(17) |
| O1 Ce1 C2                           | 94.57(18)  | O2 <sup>2</sup> Ce3 C20 <sup>2</sup>   | 122.04(18) |
| O1 <sup>1</sup> Ce1 C2              | 124.56(19) | O2 <sup>2</sup> Ce3 C21                | 129.56(19) |
| O1 Ce1 C3 <sup>1</sup>              | 95.82(19)  | O2 <sup>2</sup> Ce3 C21 <sup>2</sup>   | 93.32(18)  |
| O1 Ce1 C3                           | 86.74(18)  | O2 Ce3 C21 <sup>2</sup>                | 129.55(19) |
| O1 <sup>1</sup> Ce1 C3              | 95.82(19)  | O2 Ce3 C21                             | 93.32(18)  |
| O1 <sup>1</sup> Ce1 C3 <sup>1</sup> | 86.74(18)  | O2 Ce3 C22                             | 82.63(18)  |
| O1 <sup>1</sup> Ce1 C4              | 85.05(16)  | O2 <sup>2</sup> Ce3 C22 <sup>2</sup>   | 82.62(18)  |
| O1 <sup>1</sup> Ce1 C4 <sup>1</sup> | 108.73(17) | O2 Ce3 C22 <sup>2</sup>                | 100.9(2)   |
| O1 Ce1 C4 <sup>1</sup>              | 85.05(16)  | O2 <sup>2</sup> Ce3 C22                | 100.9(2)   |
| O1 Ce1 C4                           | 108.73(17) | O2 <sup>2</sup> Ce3 C23                | 87.48(17)  |
| O1 Ce1 C5                           | 134.67(16) | O2 Ce3 C23                             | 102.53(18) |
| O1 <sup>1</sup> Ce1 C5 <sup>1</sup> | 134.67(16) | O2 Ce3 C23 <sup>2</sup>                | 87.48(17)  |
| O1 Ce1 C5 <sup>1</sup>              | 104.78(16) | O2 <sup>2</sup> Ce3 C23 <sup>2</sup>   | 102.53(18) |
| O1 <sup>1</sup> Ce1 C5              | 104.77(16) | C00S <sup>2</sup> Ce3 C00S             | 111.2(3)   |
| C1 Ce1 C1 <sup>1</sup>              | 81.9(3)    | C20 <sup>2</sup> Ce3 C00S              | 91.21(19)  |
| C1 Ce1 C3                           | 47.4(2)    | C20 Ce3 C00S <sup>2</sup>              | 91.21(19)  |
| C1 <sup>1</sup> Ce1 C3              | 129.4(2)   | C20 Ce3 C00S                           | 28.98(17)  |
| C1 Ce1 C3 <sup>1</sup>              | 129.4(2)   | C20 <sup>2</sup> Ce3 C00S <sup>2</sup> | 28.98(17)  |
| C1 <sup>1</sup> Ce1 C3 <sup>1</sup> | 47.4(2)    | C20 Ce3 C20 <sup>2</sup>               | 81.9(3)    |
| C1 Ce1 C4                           | 47.22(19)  | C21 <sup>2</sup> Ce3 C00S <sup>2</sup> | 48.06(18)  |
| C1 Ce1 C4 <sup>1</sup>              | 117.35(19) | C21 Ce3 C00S <sup>2</sup>              | 100.4(2)   |
| C1 <sup>1</sup> Ce1 C4 <sup>1</sup> | 47.22(19)  | C21 Ce3 C00S                           | 48.06(18)  |
| C1 <sup>1</sup> Ce1 C4              | 117.34(19) | C21 <sup>2</sup> Ce3 C00S              | 100.4(2)   |
| C1 <sup>1</sup> Ce1 C5              | 88.62(19)  | C21 <sup>2</sup> Ce3 C20 <sup>2</sup>  | 28.72(19)  |
| C1 Ce1 C5 <sup>1</sup>              | 88.63(19)  | C21 Ce3 C20 <sup>2</sup>               | 103.1(2)   |
| C1 Ce1 C5                           | 29.16(18)  | C21 <sup>2</sup> Ce3 C20               | 103.1(2)   |
| C1 <sup>1</sup> Ce1 C5 <sup>1</sup> | 29.16(18)  | C21 Ce3 C20                            | 28.72(19)  |
| C2 Ce1 C1 <sup>1</sup>              | 105.5(2)   | C21 Ce3 C21 <sup>2</sup>               | 128.9(3)   |
| C2 <sup>1</sup> Ce1 C1 <sup>1</sup> | 29.22(19)  | C21 <sup>2</sup> Ce3 C23               | 125.5(2)   |
| C2 Ce1 C1                           | 29.22(19)  | C21 Ce3 C23 <sup>2</sup>               | 125.5(2)   |
| C2 <sup>1</sup> Ce1 C1              | 105.5(2)   | C21 Ce3 C23                            | 47.6(2)    |
| C2 Ce1 C2 <sup>1</sup>              | 132.7(3)   | C21 <sup>2</sup> Ce3 C23 <sup>2</sup>  | 47.6(2)    |
| C2 <sup>1</sup> Ce1 C3 <sup>1</sup> | 28.8(2)    | C22 <sup>2</sup> Ce3 C00S              | 128.9(2)   |
| C2 Ce1 C3 <sup>1</sup>              | 148.7(2)   | C22 <sup>2</sup> Ce3 C00S <sup>2</sup> | 47.84(19)  |
| C2 Ce1 C3                           | 28.8(2)    | C22 Ce3 C00S                           | 47.84(19)  |
| C2 <sup>1</sup> Ce1 C3              | 148.7(2)   | C22 Ce3 C00S <sup>2</sup>              | 128.9(2)   |
| C2 <sup>1</sup> Ce1 C4              | 124.0(2)   | C22 Ce3 C20                            | 47.0(2)    |
| C2 Ce1 C4 <sup>1</sup>              | 124.0(2)   | C22 <sup>2</sup> Ce3 C20               | 128.7(2)   |
| C2 <sup>1</sup> Ce1 C4 <sup>1</sup> | 47.5(2)    | C22 Ce3 C20 <sup>2</sup>               | 128.6(2)   |
| C2 Ce1 C4                           | 47.5(2)    | C22 <sup>2</sup> Ce3 C20 <sup>2</sup>  | 47.0(2)    |

| Atom             | Atom | Atom             | Angle (°)  | Atom             | Atom | Atom              | Angle (°)  |
|------------------|------|------------------|------------|------------------|------|-------------------|------------|
| C2               | Ce1  | C5 <sup>1</sup>  | 100.7(2)   | C22              | Ce3  | C21               | 28.6(2)    |
| C2 <sup>1</sup>  | Ce1  | C5 <sup>1</sup>  | 48.47(19)  | C22 <sup>2</sup> | Ce3  | C21               | 147.7(2)   |
| C2 <sup>1</sup>  | Ce1  | C5               | 100.7(2)   | C22 <sup>2</sup> | Ce3  | C21 <sup>2</sup>  | 28.6(2)    |
| C2               | Ce1  | C5               | 48.47(19)  | C22              | Ce3  | C21 <sup>2</sup>  | 147.7(2)   |
| C3               | Ce1  | C3 <sup>1</sup>  | 176.8(3)   | C22              | Ce3  | C22 <sup>2</sup>  | 175.6(3)   |
| C3 <sup>1</sup>  | Ce1  | C4               | 150.3(2)   | C22 <sup>2</sup> | Ce3  | C23               | 150.4(2)   |
| C3 <sup>1</sup>  | Ce1  | C4 <sup>1</sup>  | 28.73(19)  | C22 <sup>2</sup> | Ce3  | C23 <sup>2</sup>  | 28.6(2)    |
| C3               | Ce1  | C4               | 28.74(19)  | C22              | Ce3  | C23 <sup>2</sup>  | 150.4(2)   |
| C3               | Ce1  | C4 <sup>1</sup>  | 150.3(2)   | C22              | Ce3  | C23               | 28.6(2)    |
| C3               | Ce1  | C5 <sup>1</sup>  | 129.5(2)   | C23 <sup>2</sup> | Ce3  | C00S <sup>2</sup> | 29.61(18)  |
| C3               | Ce1  | C5               | 48.02(19)  | C23              | Ce3  | C00S <sup>2</sup> | 138.43(19) |
| C3 <sup>1</sup>  | Ce1  | C5               | 129.5(2)   | C23              | Ce3  | C00S              | 29.61(18)  |
| C3 <sup>1</sup>  | Ce1  | C5 <sup>1</sup>  | 48.02(19)  | C23 <sup>2</sup> | Ce3  | C00S              | 138.43(19) |
| C4               | Ce1  | C4 <sup>1</sup>  | 163.3(3)   | C23 <sup>2</sup> | Ce3  | C20 <sup>2</sup>  | 47.62(19)  |
| C4               | Ce1  | C5 <sup>1</sup>  | 134.59(18) | C23              | Ce3  | C20 <sup>2</sup>  | 120.8(2)   |
| C4               | Ce1  | C5               | 28.95(17)  | C23              | Ce3  | C20               | 47.62(19)  |
| C4 <sup>1</sup>  | Ce1  | C5 <sup>1</sup>  | 28.95(17)  | C23 <sup>2</sup> | Ce3  | C20               | 120.8(2)   |
| C4 <sup>1</sup>  | Ce1  | C5               | 134.59(18) | C23 <sup>2</sup> | Ce3  | C23               | 167.7(3)   |
| C5               | Ce1  | C5 <sup>1</sup>  | 107.1(2)   | O2 <sup>2</sup>  | Ce4  | O2                | 71.79(19)  |
| O1               | Ce2  | O1 <sup>1</sup>  | 72.28(19)  | O2               | Ce4  | C27               | 88.63(19)  |
| O1               | Ce2  | C9               | 106.22(16) | O2 <sup>2</sup>  | Ce4  | C27 <sup>2</sup>  | 88.63(19)  |
| O1 <sup>1</sup>  | Ce2  | C9 <sup>1</sup>  | 106.22(17) | O2               | Ce4  | C27 <sup>2</sup>  | 105.55(18) |
| O1               | Ce2  | C9 <sup>1</sup>  | 85.54(16)  | O2 <sup>2</sup>  | Ce4  | C27               | 105.55(18) |
| O1 <sup>1</sup>  | Ce2  | C9               | 85.54(16)  | O2 <sup>2</sup>  | Ce4  | C28 <sup>2</sup>  | 98.2(2)    |
| O1 <sup>1</sup>  | Ce2  | C10 <sup>1</sup> | 84.66(17)  | O2               | Ce4  | C28               | 98.2(2)    |
| O1               | Ce2  | C10 <sup>1</sup> | 96.82(18)  | O2 <sup>2</sup>  | Ce4  | C28               | 83.87(19)  |
| O1 <sup>1</sup>  | Ce2  | C10              | 96.82(18)  | O2               | Ce4  | C28 <sup>2</sup>  | 83.87(19)  |
| O1               | Ce2  | C10              | 84.66(17)  | O2 <sup>2</sup>  | Ce4  | C29               | 91.43(19)  |
| O1               | Ce2  | C11 <sup>1</sup> | 125.61(18) | O2               | Ce4  | C29               | 127.3(2)   |
| O1               | Ce2  | C11              | 93.90(17)  | O2 <sup>2</sup>  | Ce4  | C29 <sup>2</sup>  | 127.3(2)   |
| O1 <sup>1</sup>  | Ce2  | C11 <sup>1</sup> | 93.90(17)  | O2               | Ce4  | C29 <sup>2</sup>  | 91.43(19)  |
| O1 <sup>1</sup>  | Ce2  | C11              | 125.61(18) | O2 <sup>2</sup>  | Ce4  | C30               | 120.33(19) |
| O1               | Ce2  | C12 <sup>1</sup> | 132.11(16) | O2 <sup>2</sup>  | Ce4  | C30 <sup>2</sup>  | 134.85(19) |
| O1               | Ce2  | C12              | 122.86(17) | O2               | Ce4  | C30 <sup>2</sup>  | 120.33(19) |
| O1 <sup>1</sup>  | Ce2  | C12 <sup>1</sup> | 122.86(17) | O2               | Ce4  | C30               | 134.85(19) |
| O1 <sup>1</sup>  | Ce2  | C12              | 132.11(16) | O2 <sup>2</sup>  | Ce4  | C31               | 131.05(17) |
| O1               | Ce2  | C13 <sup>1</sup> | 104.81(15) | O2               | Ce4  | C31               | 108.41(17) |
| O1               | Ce2  | C13              | 132.74(16) | O2 <sup>2</sup>  | Ce4  | C31 <sup>2</sup>  | 108.41(17) |
| O1 <sup>1</sup>  | Ce2  | C13 <sup>1</sup> | 132.74(16) | O2               | Ce4  | C31 <sup>2</sup>  | 131.05(17) |
| O1 <sup>1</sup>  | Ce2  | C13              | 104.81(15) | C27 <sup>2</sup> | Ce4  | C27               | 162.7(3)   |
| C9               | Ce2  | C9 <sup>1</sup>  | 165.7(3)   | C27 <sup>2</sup> | Ce4  | C31 <sup>2</sup>  | 28.87(19)  |
| C9 <sup>1</sup>  | Ce2  | C13              | 136.77(19) | C27              | Ce4  | C31               | 28.87(19)  |
| C9               | Ce2  | C13              | 29.19(17)  | C27              | Ce4  | C31 <sup>2</sup>  | 134.0(2)   |
| C9               | Ce2  | C13 <sup>1</sup> | 136.77(19) | C27 <sup>2</sup> | Ce4  | C31               | 134.0(2)   |
| C9 <sup>1</sup>  | Ce2  | C13 <sup>1</sup> | 29.19(17)  | C28              | Ce4  | C27               | 27.7(2)    |
| C10 <sup>1</sup> | Ce2  | C9               | 150.8(2)   | C28 <sup>2</sup> | Ce4  | C27               | 151.5(2)   |
| C10 <sup>1</sup> | Ce2  | C9 <sup>1</sup>  | 28.71(19)  | C28              | Ce4  | C27 <sup>2</sup>  | 151.5(2)   |
| C10              | Ce2  | C9               | 28.71(19)  | C28 <sup>2</sup> | Ce4  | C27 <sup>2</sup>  | 27.7(2)    |
| C10              | Ce2  | C9 <sup>1</sup>  | 150.8(2)   | C28              | Ce4  | C28 <sup>2</sup>  | 177.5(3)   |
| C10 <sup>1</sup> | Ce2  | C10              | 178.2(3)   | C28              | Ce4  | C29               | 29.2(2)    |
| C10              | Ce2  | C13 <sup>1</sup> | 130.31(19) | C28 <sup>2</sup> | Ce4  | C29 <sup>2</sup>  | 29.2(2)    |
| C10              | Ce2  | C13              | 48.28(18)  | C28              | Ce4  | C29 <sup>2</sup>  | 148.8(3)   |
| C10 <sup>1</sup> | Ce2  | C13              | 130.31(19) | C28 <sup>2</sup> | Ce4  | C29               | 148.8(3)   |

| Atom             | Atom | Atom             | Angle (°)  | Atom             | Atom | Atom             | Angle (°)  |
|------------------|------|------------------|------------|------------------|------|------------------|------------|
| C10 <sup>1</sup> | Ce2  | C13 <sup>1</sup> | 48.28(18)  | C28              | Ce4  | C30 <sup>2</sup> | 130.4(2)   |
| C11              | Ce2  | C9               | 47.2(2)    | C28 <sup>2</sup> | Ce4  | C30              | 130.4(2)   |
| C11 <sup>1</sup> | Ce2  | C9 <sup>1</sup>  | 47.2(2)    | C28 <sup>2</sup> | Ce4  | C30 <sup>2</sup> | 47.1(2)    |
| C11 <sup>1</sup> | Ce2  | C9               | 125.3(2)   | C28              | Ce4  | C30              | 47.1(2)    |
| C11              | Ce2  | C9 <sup>1</sup>  | 125.3(2)   | C28              | Ce4  | C31              | 47.2(2)    |
| C11              | Ce2  | C10              | 28.79(19)  | C28 <sup>2</sup> | Ce4  | C31 <sup>2</sup> | 47.2(2)    |
| C11 <sup>1</sup> | Ce2  | C10              | 149.7(2)   | C28              | Ce4  | C31 <sup>2</sup> | 130.8(2)   |
| C11 <sup>1</sup> | Ce2  | C10 <sup>1</sup> | 28.79(19)  | C28 <sup>2</sup> | Ce4  | C31              | 130.8(2)   |
| C11              | Ce2  | C10 <sup>1</sup> | 149.7(2)   | C29              | Ce4  | C27              | 47.3(2)    |
| C11 <sup>1</sup> | Ce2  | C11              | 132.5(3)   | C29 <sup>2</sup> | Ce4  | C27 <sup>2</sup> | 47.3(2)    |
| C11              | Ce2  | C13              | 48.23(18)  | C29 <sup>2</sup> | Ce4  | C27              | 124.2(2)   |
| C11 <sup>1</sup> | Ce2  | C13              | 101.56(19) | C29              | Ce4  | C27 <sup>2</sup> | 124.2(2)   |
| C11 <sup>1</sup> | Ce2  | C13 <sup>1</sup> | 48.23(18)  | C29 <sup>2</sup> | Ce4  | C29              | 134.2(4)   |
| C11              | Ce2  | C13 <sup>1</sup> | 101.56(19) | C29 <sup>2</sup> | Ce4  | C30              | 107.0(3)   |
| C12              | Ce2  | C9 <sup>1</sup>  | 119.26(18) | C29              | Ce4  | C30              | 29.0(2)    |
| C12              | Ce2  | C9               | 47.45(18)  | C29              | Ce4  | C30 <sup>2</sup> | 107.0(3)   |
| C12 <sup>1</sup> | Ce2  | C9               | 119.26(18) | C29 <sup>2</sup> | Ce4  | C30 <sup>2</sup> | 29.0(2)    |
| C12 <sup>1</sup> | Ce2  | C9 <sup>1</sup>  | 47.45(18)  | C29 <sup>2</sup> | Ce4  | C31              | 101.6(2)   |
| C12              | Ce2  | C10 <sup>1</sup> | 130.4(2)   | C29              | Ce4  | C31 <sup>2</sup> | 101.6(2)   |
| C12 <sup>1</sup> | Ce2  | C10              | 130.4(2)   | C29              | Ce4  | C31              | 48.0(2)    |
| C12 <sup>1</sup> | Ce2  | C10 <sup>1</sup> | 47.78(19)  | C29 <sup>2</sup> | Ce4  | C31 <sup>2</sup> | 48.0(2)    |
| C12              | Ce2  | C10              | 47.78(19)  | C30              | Ce4  | C27              | 46.8(2)    |
| C12              | Ce2  | C11              | 29.09(18)  | C30              | Ce4  | C27 <sup>2</sup> | 117.4(2)   |
| C12 <sup>1</sup> | Ce2  | C11              | 105.6(2)   | C30 <sup>2</sup> | Ce4  | C27 <sup>2</sup> | 46.8(2)    |
| C12              | Ce2  | C11 <sup>1</sup> | 105.6(2)   | C30 <sup>2</sup> | Ce4  | C27              | 117.4(2)   |
| C12 <sup>1</sup> | Ce2  | C11 <sup>1</sup> | 29.09(18)  | C30              | Ce4  | C30 <sup>2</sup> | 83.3(3)    |
| C12              | Ce2  | C12 <sup>1</sup> | 82.6(3)    | C30              | Ce4  | C31 <sup>2</sup> | 88.9(2)    |
| C12 <sup>1</sup> | Ce2  | C13 <sup>1</sup> | 29.23(16)  | C30 <sup>2</sup> | Ce4  | C31 <sup>2</sup> | 28.66(19)  |
| C12 <sup>1</sup> | Ce2  | C13              | 90.21(18)  | C30 <sup>2</sup> | Ce4  | C31              | 88.9(2)    |
| C12              | Ce2  | C13 <sup>1</sup> | 90.21(18)  | C30              | Ce4  | C31              | 28.66(19)  |
| C12              | Ce2  | C13              | 29.23(17)  | C31              | Ce4  | C31 <sup>2</sup> | 106.2(3)   |
| C13 <sup>1</sup> | Ce2  | C13              | 109.3(2)   | C00S             | Si3  | C24              | 108.5(4)   |
| C6               | Si1  | C5               | 115.1(3)   | C00S             | Si3  | C26              | 108.9(4)   |
| C7               | Si1  | C5               | 108.4(4)   | C24              | Si3  | C26              | 108.3(5)   |
| C7               | Si1  | C6               | 108.2(5)   | C25              | Si3  | C00S             | 112.9(3)   |
| C7               | Si1  | C8               | 109.9(5)   | C25              | Si3  | C24              | 108.8(5)   |
| C8               | Si1  | C5               | 107.5(4)   | C25              | Si3  | C26              | 109.4(5)   |
| C8               | Si1  | C6               | 107.6(4)   | C31              | Si4  | C33              | 114.3(5)   |
| C13              | Si2  | C16              | 108.1(4)   | C31              | Si4  | C33A             | 102.0(11)  |
| C14              | Si2  | C13              | 107.7(3)   | C32              | Si4  | C31              | 110.4(5)   |
| C14              | Si2  | C16              | 111.2(5)   | C32              | Si4  | C33              | 106.2(9)   |
| C15              | Si2  | C13              | 114.1(3)   | C32              | Si4  | C34              | 109.4(8)   |
| C15              | Si2  | C14              | 107.9(4)   | C34              | Si4  | C31              | 110.9(5)   |
| C15              | Si2  | C16              | 107.9(4)   | C34              | Si4  | C33              | 105.4(8)   |
| Ce1              | O1   | Ce2              | 107.58(15) | C32A             | Si4  | C31              | 106.0(14)  |
| C17              | O1   | Ce1              | 141.2(7)   | C32A             | Si4  | C33A             | 103.6(18)  |
| C17              | O1   | Ce2              | 111.2(7)   | C34A             | Si4  | C31              | 110.9(10)  |
| C17A             | O1   | Ce1              | 109.3(6)   | C34A             | Si4  | C32A             | 125.9(19)  |
| C17A             | O1   | Ce2              | 143.1(6)   | C34A             | Si4  | C33A             | 105.7(18)  |
| C2               | C1   | Ce1              | 75.4(4)    | Ce3              | O2   | Ce4              | 107.81(15) |
| C2               | C1   | C5               | 109.9(6)   | C35              | O2   | Ce3              | 140.6(4)   |
| C5               | C1   | Ce1              | 77.8(3)    | C35              | O2   | Ce4              | 111.6(4)   |
| C1               | C2   | Ce1              | 75.4(3)    | Si3              | C00S | Ce3              | 126.3(3)   |



| Atom            | Atom | Atom | Angle (°) | Atom | Atom | Atom | Angle (°) |
|-----------------|------|------|-----------|------|------|------|-----------|
| C3              | C2   | Ce1  | 76.4(4)   | C20  | C00S | Ce3  | 74.4(3)   |
| C3              | C2   | C1   | 107.2(6)  | C20  | C00S | Si3  | 127.4(5)  |
| C2              | C3   | Ce1  | 74.8(4)   | C20  | C00S | C23  | 104.8(6)  |
| C2              | C3   | C4   | 108.5(6)  | C23  | C00S | Ce3  | 73.2(3)   |
| C4              | C3   | Ce1  | 76.4(3)   | C23  | C00S | Si3  | 126.7(5)  |
| C3              | C4   | Ce1  | 74.9(4)   | C00S | C20  | Ce3  | 76.6(4)   |
| C3              | C4   | C5   | 109.6(6)  | C21  | C20  | Ce3  | 74.1(4)   |
| C5              | C4   | Ce1  | 76.4(3)   | C21  | C20  | C00S | 109.5(6)  |
| Si1             | C5   | Ce1  | 125.4(3)  | C20  | C21  | Ce3  | 77.2(4)   |
| C1              | C5   | Ce1  | 73.0(3)   | C22  | C21  | Ce3  | 75.4(4)   |
| C1              | C5   | Si1  | 126.7(5)  | C22  | C21  | C20  | 107.7(6)  |
| C4              | C5   | Ce1  | 74.7(3)   | C21  | C22  | Ce3  | 75.9(4)   |
| C4              | C5   | Si1  | 127.5(5)  | C21  | C22  | C23  | 110.0(6)  |
| C4              | C5   | C1   | 104.8(6)  | C23  | C22  | Ce3  | 76.6(4)   |
| C10             | C9   | Ce2  | 75.5(4)   | C00S | C23  | Ce3  | 77.2(3)   |
| C10             | C9   | C13  | 110.0(6)  | C22  | C23  | Ce3  | 74.8(4)   |
| C13             | C9   | Ce2  | 76.0(3)   | C22  | C23  | C00S | 108.0(6)  |
| C9              | C10  | Ce2  | 75.8(4)   | C28  | C27  | Ce4  | 74.6(4)   |
| C11             | C10  | Ce2  | 75.1(4)   | C28  | C27  | C31  | 109.9(7)  |
| C11             | C10  | C9   | 107.5(6)  | C31  | C27  | Ce4  | 77.1(4)   |
| C10             | C11  | Ce2  | 76.1(4)   | C27  | C28  | Ce4  | 77.6(4)   |
| C10             | C11  | C12  | 108.3(6)  | C27  | C28  | C29  | 109.8(7)  |
| C12             | C11  | Ce2  | 75.2(3)   | C29  | C28  | Ce4  | 75.9(4)   |
| C11             | C12  | Ce2  | 75.7(3)   | C28  | C29  | Ce4  | 74.9(4)   |
| C11             | C12  | C13  | 109.1(6)  | C30  | C29  | Ce4  | 76.3(4)   |
| C13             | C12  | Ce2  | 76.9(3)   | C30  | C29  | C28  | 105.4(7)  |
| Si2             | C13  | Ce2  | 126.5(3)  | C29  | C30  | Ce4  | 74.7(4)   |
| C9              | C13  | Ce2  | 74.8(3)   | C31  | C30  | Ce4  | 77.3(4)   |
| C9              | C13  | Si2  | 126.4(5)  | C31  | C30  | C29  | 109.9(7)  |
| C12             | C13  | Ce2  | 73.8(3)   | Si4  | C31  | Ce4  | 128.5(3)  |
| C12             | C13  | Si2  | 127.2(5)  | C27  | C31  | Ce4  | 74.0(4)   |
| C12             | C13  | C9   | 105.1(5)  | C27  | C31  | Si4  | 126.0(6)  |
| O1              | C17  | C18  | 112.2(18) | C30  | C31  | Ce4  | 74.0(4)   |
| O1              | C17  | C19  | 115.5(18) | C30  | C31  | Si4  | 127.3(6)  |
| C19             | C17  | C18  | 115(2)    | C30  | C31  | C27  | 105.0(6)  |
| O1              | C17A | C18A | 111.6(19) | O2   | C35  | C36  | 114.3(6)  |
| O1              | C17A | C19A | 111.0(18) | O2   | C35  | C37  | 112.8(6)  |
| C19A            | C17A | C18A | 112(2)    | C36  | C35  | C37  | 114.0(6)  |
| O2 <sup>2</sup> | Ce3  | O2   | 72.6(2)   |      |      |      |           |

<sup>1</sup>3/2-X,+Y,1/2-Z; <sup>2</sup>1/2-X,+Y,1/2-Z

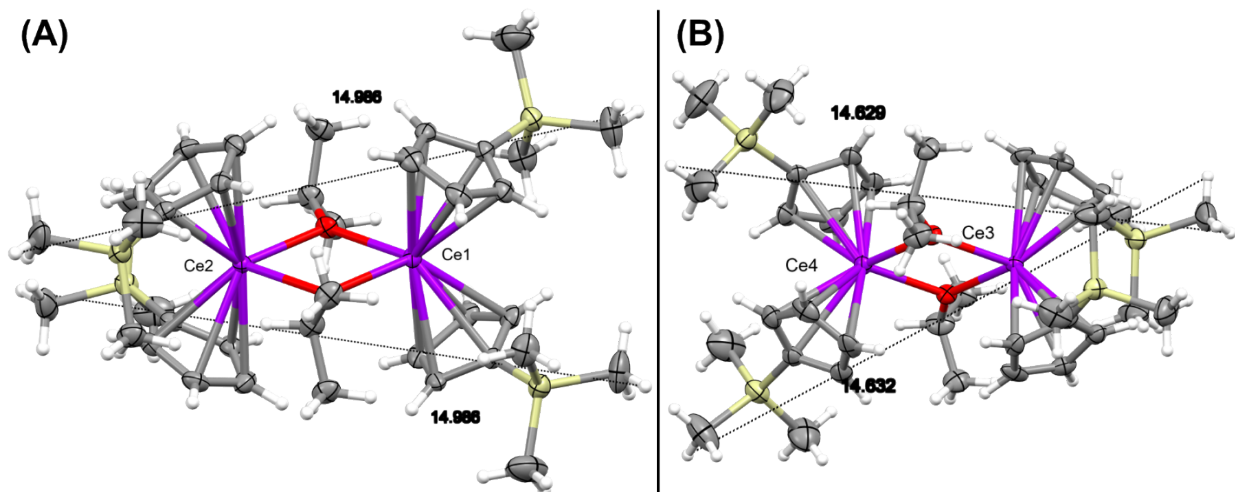

**Fig S24.** Points used for determination of  $r_{\text{H(theo)}}$  from the crystal structure of **2-Ce<sup>i</sup>Pr**, where  $r_{\text{H(theo)}}$  is estimated as half the longest distance observed in the crystal structure.

## References

1. Palumbo, C. T.; Darago, L. E.; Windorff, C. J.; Ziller, J. W.; Evans, W. J. Trimethylsilyl versus Bis(trimethylsilyl) Substitution in Tris(cyclopentadienyl) Complexes of La, Ce, and Pr: Comparison of Structure, Magnetic Properties, and Reactivity. *Organometallics* **2018**, *37*, 900-905.
